# Supplementary material for: Material‐Assisted Strategies for Osteochondral Defect Repair
Source: PubMed Central journal article supplement (PMC9165504; doi:10.1002/advs.202200050), 2022-03-24
Supplement: ADVS-9-2200050-s001.pdf [file ADVS-9-2200050-s001.pdf]

## Supplementary Information 1

### 1. Keyword search:

A literature search was performed in the PubMed and Web of Science databases, using the keywords “osteocondral”, “repair”, “regeneration”, “biomaterial”, with AND/OR operators. The original articles published on the subject between January 1, 2015 and November 30, 2021 were identified. After removing the duplicates, the remaining articles were screened by title and abstract. When the title and abstract were not sufficiently informative, the Material and Methods section was consulted.

### 2. Inclusion/exclusion criteria

Included articles were written in English, and reported the preclinical evaluation of biomaterial- assisted strategies for the repair of OC defects. Exclusion criteria were: (i) the use of a biomaterial as an intra-articular injection only (not in a defect), (ii) the evaluation of the OC regeneration potential by a subcutaneous injection only, (iii) the involvement of an osteoarthritic animal model. A total of 289 publications in accordance with our criteria were identified and used to perform a meta-analysis of the biomaterial design, the biological elements added, and the methods used for repair and/or regeneration assessment of osteochondral defects.

**Supplementary Table 1 : Summary of the main strategies used**

| General approach |                  |                           | Composition of OC implants                 |                      |                          |           |           | Implantation aspects           |                                     |               | Analysis techniques |             |     |          |              | Original articles                                                                                                                                                                                                                                                                                                         |
|------------------|------------------|---------------------------|--------------------------------------------|----------------------|--------------------------|-----------|-----------|--------------------------------|-------------------------------------|---------------|---------------------|-------------|-----|----------|--------------|---------------------------------------------------------------------------------------------------------------------------------------------------------------------------------------------------------------------------------------------------------------------------------------------------------------------------|
| Overall strategy | Number of layers | Difference between layers | Layer 1                                    | Layer 2              | Layer 3                  | Cell type | Biologics | Retention means                | Implant shaping                     | Animal model  | Histo.              | Macro. obs. | IHC | Micro-CT | Biomechanics | References                                                                                                                                                                                                                                                                                                                |
| Biomat only      | Monolayer        | /                         | PLGA                                       | /                    | /                        | /         | /         | Press-fit                      | Molding                             | Rabbit        | X                   | X           | X   | X        |              | Chang, Nai-Jen et al. “Positive effects of cell-free porous PLGA implants and early loading exercise on hyaline cartilage regeneration in rabbits.” <i>Acta biomaterialia</i> vol. 28 (2015): 128-137.                                                                                                                    |
| Biomat only      | Monolayer        | /                         | PLGA                                       | /                    | /                        | /         | /         | Press-fit                      | Molding                             | Rabbit        | X                   | X           | X   | X        |              | Wang, Hsueh-Chun et al. “Intra-articular injection of N-acetylglucosamine and hyaluronic acid combined with PLGA scaffolds for osteochondral repair in rabbits.” <i>PloS one</i> vol. 13,12 e0209747. 31 Dec. 2018.                                                                                                       |
| Biomat only      | Monolayer        | /                         | PLGA                                       | /                    | /                        | /         | /         | Press-fit                      | Molding                             | Minipig       | X                   | X           | X   | X        |              | Lin, Chih-Chan et al. “Beneficial Therapeutic Approach of Acellular PLGA Implants Coupled With Rehabilitation Exercise for Osteochondral Repair: A Proof of Concept Study in a Minipig Model.” <i>The American journal of sports medicine</i> vol. 48,11 (2020): 2796-2807.                                               |
| Biomat only      | Monolayer        | /                         | HA                                         | /                    | /                        | /         | /         | /                              | Commercial                          | Rabbit        | X                   | X           |     |          |              | Uçan, Vahdet et al. “Comparison of Small-diameter-hole and Traditional Microfracture in Cartilage Repair and the Effect of Adding a Hyaluronic Acid-based Acellular Matrix Scaffold : An Animal Study.” <i>Bezmialem Science</i> , 9(1), (2021) 84-90.                                                                    |
| Biomat only      | Monolayer        | /                         | Cartilage ECM + peptide nanofiber hydrogel | /                    | /                        | /         | /         | /                              | Molding                             | Rabbit        | X                   | X           | X   |          |              | Sun, Xun et al. “In Situ Articular Cartilage Regeneration through Endogenous Reparative Cell Homing Using a Functional Bone Marrow-Specific Scaffolding System.” <i>ACS applied materials &amp; interfaces</i> vol. 10,45 (2018): 38715-38728.                                                                            |
| Biomat only      | Trilayer         | Biomat                    | Cartilage ECM                              | PLGA + b-TCP         | PLGA + b-TCP             | /         | /         | Press-fit                      | Molding + 3D-printing               | Goat          | X                   | X           | X   |          | X            | Jia, Shuajun et al. “Multilayered Scaffold with a Compact Interfacial Layer Enhances Osteochondral Defect Repair.” <i>ACS applied materials &amp; interfaces</i> vol. 10,24 (2018): 20296-20305                                                                                                                           |
| Biomat only      | Monolayer        |                           | CS + silk fibroin                          | /                    | /                        | /         | /         | /                              | Molding                             | Rabbit        | X                   | X           |     |          |              | Zhou, Feifei et al. “Silk fibroin-chondroitin sulfate scaffold with immuno-inhibition property for articular cartilage repair.” <i>Acta biomaterialia</i> vol. 63 (2017): 64-75.                                                                                                                                          |
| Biomat only      | Trilayer         | Biomat                    | Col I + Col II + HA                        | Col I + Col II + HAP | Col I + HAP              | /         | /         | Press-fit                      | Cut                                 | Rabbit        | X                   | X           | X   | X        |              | Levingstone, Tanya J et al. “Multi-layered collagen-based scaffolds for osteochondral defect repair in rabbits.” <i>Acta biomaterialia</i> vol. 32 (2016): 149-160.                                                                                                                                                       |
| Biomat only      | Bilayer          | Biomat                    | Cartilage ECM                              | /                    | Growth plate ECMs        | /         | /         | Press-fit                      | Molding                             | Goat          | X                   | X           | X   |          |              | Cunniffe, Gráinne M et al. “Tissue-specific extracellular matrix scaffolds for the regeneration of spatially complex musculoskeletal tissues.” <i>Biomaterials</i> vol. 188 (2019): 63-73.                                                                                                                                |
| Biomat only      | Monolayer        | Biomat                    | PCL + HAP                                  | /                    | /                        | /         | /         | /                              | 3D-printing                         | Rabbit        | X                   | X           |     | X        |              | Du, Yingying et al. “Selective laser sintering scaffold with hierarchical architecture and gradient composition for osteochondral repair in rabbits.” <i>Biomaterials</i> vol. 137 (2017): 37-48                                                                                                                          |
| Biomat only      | Trilayer         | Biomat                    | Col I + Col II + HA                        | Col I + HA           | Col I + HAP              | /         | /         | /                              | Cut                                 | Goat          | X                   | X           |     | X        |              | Levingstone, Tanya J et al. “Cell-free multi-layered collagen-based scaffolds demonstrate layer specific regeneration of functional osteochondral tissue in caprine joints.” <i>Biomaterials</i> vol. 87 (2016): 69-81.                                                                                                   |
| Biomat only      | Bilayer          | Biomat                    | CS-MA + PNIPAAm                            | /                    | PCL + PEG                | /         | /         | /                              | Other                               | Rabbit        | X                   | X           |     | X        | X            | Liao, Jinfeng et al. “The fabrication of biomimetic biphasic CAN-PAC hydrogel with a seamless interfacial layer applied in osteochondral defect repair.” <i>Bone research</i> vol. 5 17018. 4 Jul. 2017.                                                                                                                  |
| Biomat only      | Monolayer        | /                         | Biopolymers                                | /                    | /                        | /         | /         | /                              | Undefined                           | Rabbit        | X                   |             |     |          |              | Albuquerque, Paulo Cezar Vidal Carneiro de et al. “A comparative study of the areas of osteochondral defects produced in femoral condyles of rabbits treated with sugar cane biopolymer gel.” <i>Acta cirurgica brasileira</i> vol. 30,11 (2015): 770-7.                                                                  |
| Biomat only      | Monolayer        | /                         | CS + PEG                                   | /                    | /                        | /         | /         | /                              | Injection                           | Rat           | X                   |             | X   |          |              | Schaeffer, Christine et al. “Injectable Microannealed Porous Scaffold for Articular Cartilage Regeneration.” <i>Annals of plastic surgery</i> vol. 84,6S Suppl 5 (2020): S446-S450.                                                                                                                                       |
| Biomat only      | Monolayer        | /                         | Parylene                                   | /                    | /                        | /         | /         | /                              | Other                               | Rabbit        | X                   | X           | X   |          |              | Franciozi, Carlos Eduardo da Silveira et al. “Parylene scaffold for cartilage lesion.” <i>Biomedical microdevices</i> vol. 19,2 (2017): 26.                                                                                                                                                                               |
| Biomat only      | Monolayer        | /                         | PAMPS + PDMAAm                             | /                    | /                        | /         | /         | Press-fit                      | Molding                             | Rabbit        | X                   | X           | X   |          |              | Higa, Kotaro et al. “Effects of osteochondral defect size on cartilage regeneration using a double-network hydrogel.” <i>BMC musculoskeletal disorders</i> vol. 18,1 210. 22 May. 2017.                                                                                                                                   |
| Biomat only      | Bilayer          | Biomat                    | PCL                                        | /                    | PCL                      | /         | /         | Press-fit                      | 3D-printing + Electrospinning + Cut | Sheep         | X                   | X           |     |          | X            | Schagemann, Jan C et al. “Bilayer Implants: Electromechanical Assessment of Regenerated Articular Cartilage in a Sheep Model.” <i>Cartilage</i> vol. 7,4 (2016): 346-60.                                                                                                                                                  |
| Biomat only      | Monolayer        |                           | Alginate + HAP + PLA                       | /                    |                          | /         | /         | Press-fit                      | Other                               | Rabbit        | X                   | X           |     |          |              | Žylińska, Beata et al. “Osteochondral Repair Using Porous Three-dimensional Nanocomposite Scaffolds in a Rabbit Model.” <i>In vivo (Athens, Greece)</i> vol. 31,5 (2017): 895-903.                                                                                                                                        |
| Biomat only      | Bilayer          | Biomat                    | Chitosan + Col                             | /                    | Chitosan + Col + HAP     | /         | /         | /                              | Other                               | Rabbit, sheep | X                   | X           | X   | X        |              | Roffi, Alice et al. “A Composite Chitosan-Reinforced Scaffold Fails to Provide Osteochondral Regeneration.” <i>International journal of molecular sciences</i> vol. 20,9 2227. 7 May. 2019.                                                                                                                               |
| Biomat only      | Bilayer          | Biomat                    | Col II + HA + PG                           | /                    | Col II + HA + HAP + PG   | /         | /         | /                              | Other                               | Rat           | X                   | X           |     |          |              | Kumai, Takanori et al. “A novel, self-assembled artificial cartilage-hydroxyapatite conjugate for combined articular cartilage and subchondral bone repair: histopathological analysis of cartilage tissue engineering in rat knee joints.” <i>International journal of nanomedicine</i> vol. 14 1283-1298. 19 Feb. 2019. |
| Biomat only      | Monolayer        | /                         |                                            | /                    | HAP + PCL                | /         | /         | /                              | 3D-printing                         | Rabbit        | X                   |             | X   |          |              | Wei, Bo et al. “Three-dimensional polycaprolactone-hydroxyapatite scaffolds combined with bone marrow cells for cartilage tissue engineering.” <i>Journal of biomaterials applications</i> vol. 30,2 (2015): 160-70.                                                                                                      |
| Biomat only      | Monolayer        | /                         | PAMPS + PDMAAm                             | /                    | /                        | /         | /         | /                              | Molding                             | Sheep         | X                   | X           |     |          |              | Kitamura, Nobuto et al. “In vivo cartilage regeneration induced by a double-network hydrogel: Evaluation of a novel therapeutic strategy for femoral articular cartilage defects in a sheep model.” <i>Journal of biomedical materials research. Part A</i> vol. 104,9 (2016): 2159-65.                                   |
| Biomat only      | Monolayer        | /                         | HA + PNIPAAm                               | /                    | /                        | /         | /         | /                              | Injection                           | Rabbit        | X                   | X           |     |          |              | D’Este, Matteo et al. “Evaluation of an injectable thermoresponsive hyaluronan hydrogel in a rabbit osteochondral defect model.” <i>Journal of biomedical materials research. Part A</i> vol. 104,6 (2016): 1469-78.                                                                                                      |
| Biomat only      | Monolayer        | /                         | Osteochondral ECM                          | /                    | /                        | /         | /         | /                              | Other                               | Rabbit        | X                   | X           |     | X        |              | Hiemer, Bettina et al. “Repair of cartilage defects with devitalized osteochondral tissue: A pilot animal study.” <i>Journal of biomedical materials research. Part B, Applied biomaterials</i> vol. 107,7 (2019): 2354-2364.                                                                                             |
| Biomat only      | Monolayer        | /                         | AH                                         | /                    | /                        | /         | /         | Hyaluronic acid gel            | Punch                               | Rabbit        | X                   | X           |     |          |              | Bauer, Christoph et al. “Hyaluronan thiomers gel/matrix mediated healing of articular cartilage defects in New Zealand White rabbits-a pilot study.” <i>Journal of experimental orthopaedics</i> vol. 4,1 (2017): 14.                                                                                                     |
| Biomat only      | Bilayer          | Biomat                    | Alginate + HA                              | /                    | Alginate + HAP           | /         | /         | Press-fit for Sheep for Rabbit | Punch                               | Rabbit, sheep | X                   | X           | X   | X        |              | Filardo, Giuseppe et al. “Novel alginate biphasic scaffold for osteochondral regeneration: an in vivo evaluation in rabbit and sheep models.” <i>Journal of materials science. Materials in medicine</i> vol. 29,6 74. 26 May. 2018.                                                                                      |
| Biomat only      | Monolayer        | /                         | Chitosan + D-(+) raffinose                 | /                    | /                        | /         | /         | Flap                           | Undefined                           | Rabbit        | X                   | X           |     |          |              | Ravanetti, Francesca et al. “Chitosan-based scaffold modified with D-(+) raffinose for cartilage repair: an in vivo study.” <i>Journal of negative results in biomedicine</i> vol. 14,2. 14 Jan. 2015.                                                                                                                    |
| Biomat only      | Trilayer         | Biomat                    | PGA                                        | PLA                  | b-TCP+ Col I + PCL + PLA | /         | /         | /                              | Molding                             | Sheep         | X                   | X           | X   |          |              | Yucekul, Altug et al. “Tri-layered composite plug for the repair of osteochondral defects: in vivo study in sheep.” <i>Journal of tissue engineering</i> vol. 8 2041731417697500. 13 Apr. 2017.                                                                                                                           |
| Biomat only      | Monolayer        | /                         | GelMA + HA-MA                              | /                    | /                        | /         | /         | /                              | Malleable                           | Rabbit        | X                   | X           |     | X        |              | Lin, Hang et al. “Optimization of photocrosslinked gelatin/hyaluronic acid hybrid scaffold for the repair of cartilage defect.” <i>Journal of tissue engineering and regenerative medicine</i> vol. 13,8 (2019): 1418-1429.                                                                                               |
| Biomat only      | Bilayer          | /                         | Cartilage ECM + CaP                        | /                    | b-TCP                    | /         | /         | Press-fit                      | 3D-printing + Molding               | Horse         | X                   | X           | X   | X        | X            | Vindas Bolaños, R A et al. “The use of a cartilage decellularized matrix scaffold for the repair of osteochondral defects: the importance of long-term studies in a large animal model.” <i>Osteoarthritis and cartilage</i> vol. 25,3 (2017): 413-420.                                                                   |
| Biomat only      | Monolayer        | /                         | Alginate                                   | /                    | /                        | /         | /         | /                              | Undefined                           | Dog           | X                   | X           | X   |          |              | Onodera, Tomohiro et al. “Therapeutic effects and adaptive limits of an acellular technique by ultrapurified alginate (UPAL) gel implantation in canine osteochondral defect models.” <i>Regenerative therapy</i> vol. 14 154-159. 20 Feb. 2020.                                                                          |

|             |                     |        |                                                                         |   |                                                      |   |   |             |                                                          |        |   |   |   |   |                                                                                                                                                                                                                                                                                                                                                                 |
|-------------|---------------------|--------|-------------------------------------------------------------------------|---|------------------------------------------------------|---|---|-------------|----------------------------------------------------------|--------|---|---|---|---|-----------------------------------------------------------------------------------------------------------------------------------------------------------------------------------------------------------------------------------------------------------------------------------------------------------------------------------------------------------------|
| Biomat only | Monolayer           | /      | BG + Fibrin                                                             | / | /                                                    | / | / | Fibrin glue | Malleable                                                | Rabbit | X | X |   |   | Zazgyva, AncuȚa Marielena et al. "S53P4 bioactive glass and fibrin glue for the treatment of osteochondral lesions of the knee - a preliminary in vivo study in rabbits." <i>Romanian journal of morphology and embryology = Revue roumaine de morphologie et embryologie</i> vol. 56,3 (2015): 1085-90.                                                        |
| Biomat only | Monolayer           | /      | HA + heparan sulfate                                                    | / | /                                                    | / | / | /           | Undefined                                                | Rabbit | X | X | X |   | Lee, Jonathan H et al. "A Heparan Sulfate Device for the Regeneration of Osteochondral Defects." <i>Tissue engineering. Part A</i> vol. 25,5-6 (2019): 352-363                                                                                                                                                                                                  |
| Biomat only | Monolayer           | /      | Osteochondral ECM                                                       | / | /                                                    | / | / | Press-fit   | Other                                                    | Sheep  | X |   |   | X | Novak, Tyler et al. "In Vivo Cellular Infiltration and Remodeling in a Decellularized Ovine Osteochondral Allograft." <i>Tissue engineering. Part A</i> vol. 22,21-22 (2016): 1274-1285.                                                                                                                                                                        |
| Biomat only | Monolayer           | /      | PLGA + amnion-derived ECM                                               | / | /                                                    | / | / | /           | Cut                                                      | Rat    | X |   | X |   | Nogami, Makiko et al. "A Human Amnion-Derived Extracellular Matrix-Coated Cell-Free Scaffold for Cartilage Repair: In Vitro and In Vivo Studies." <i>Tissue engineering. Part A</i> vol. 22,7-8 (2016): 680-8.                                                                                                                                                  |
| Biomat only | Monolayer           | /      | PCL                                                                     | / | /                                                    | / | / | Fibrin glue | 3D-printing (study 1)<br>3D-printing + Molding (study 3) | Horse  | X |   |   | X | Mancini, Irina A D et al. "Fixation of Hydrogel Constructs for Cartilage Repair in the Equine Model: A Challenging Issue." <i>Tissue engineering. Part C, Methods</i> vol. 23,11 (2017): 804-814.                                                                                                                                                               |
| Biomat only | Monolayer           | /      | Alginate                                                                | / | /                                                    | / | / | /           | Injection                                                | Rabbit | X | X |   | X | Baba, Rikiya et al. "A Novel Bone Marrow Stimulation Technique Augmented by Administration of Ultrapurified Alginate Gel Enhances Osteochondral Repair in a Rabbit Model." <i>Tissue engineering. Part C, Methods</i> vol. 21,12 (2015): 1263-73.                                                                                                               |
| Biomat only | Bilayer             | Biomat | PU                                                                      | / | PEEK                                                 | / | / | Press-fit   | Undefined                                                | Poney  | X |   | X |   | Korthagen, N M et al. "A short-term evaluation of a thermoplastic polyurethane implant for osteochondral defect repair in an equine model." <i>Veterinary journal (London, England : 1997)</i> vol. 251 (2019): 105340.                                                                                                                                         |
| Biomat only | Bilayer             | Biomat | Cartilage ECM                                                           | / | Osteochondral ECM                                    | / | / | /           | Undefined                                                | Rabbit | X |   | X |   | Lin, X et al. "Biphasic hierarchical extracellular matrix scaffold for osteochondral defect regeneration." <i>Osteoarthritis and cartilage</i> vol. 26,3 (2018): 433-444.                                                                                                                                                                                       |
| Biomat only | Bilayer             | Biomat | Silk fibroin                                                            | / | Silk fibroin + CaP                                   | / | / | Press-fit   | Molding                                                  | Rabbit | X | X | X | X | Yan, Le-Ping et al. "Bilayered silk/silk-nanoCaP scaffolds for osteochondral tissue engineering: In vitro and in vivo assessment of biological performance." <i>Acta biomaterialia</i> vol. 12 (2015): 227-241.                                                                                                                                                 |
| Biomat only | Monolayer           | /      | PLGA + magnesium hydroxide                                              | / | /                                                    | / | / | /           | Molding                                                  | Rat    | X | X | X |   | Park, Kwang-Sook et al. "Versatile effects of magnesium hydroxide nanoparticles in PLGA scaffold-mediated chondrogenesis." <i>Acta biomaterialia</i> vol. 73 (2018): 204-216.                                                                                                                                                                                   |
| Biomat only | Bilayer             | Biomat | Col                                                                     | / | BCP                                                  | / | / | /           | Molding + other                                          | Rabbit | X | X | X | X | Seong, Yun-Jeong et al. "Calcium Phosphate-Collagen Scaffold with Aligned Pore Channels for Enhanced Osteochondral Regeneration." <i>Advanced healthcare materials</i> vol. 6,24 (2017): 10.1002/adhm.201709066.                                                                                                                                                |
| Biomat only | Monolayer           | /      | HAP + PAMPS + PDMAm                                                     | / | /                                                    | / | / | /           | Molding                                                  | Rabbit | X |   |   | X | Nonoyama, Takayuki et al. "Double-Network Hydrogels Strongly Bondable to Bones by Spontaneous Osteogenesis Penetration." <i>Advanced materials (Deerfield Beach, Fla.)</i> vol. 28,31 (2016): 6740-5.                                                                                                                                                           |
| Biomat only | Bilayer             | Biomat | PACG + GelMA                                                            | / | BG + GelMA + PACG                                    | / | / | /           | 3D-printing                                              | Rat    | X |   | X | X | Gao, Fei et al. "Osteochondral Regeneration with 3D-Printed Biodegradable High-Strength Supramolecular Polymer Reinforced-Gelatin Hydrogel Scaffolds." <i>Advanced science (Weinheim, Baden-Wuerttemberg, Germany)</i> vol. 6,15 1900867. 11 Jun. 2019.                                                                                                         |
| Biomat only | Bilayer             | Biomat | Aragonite                                                               | / | Aragonite                                            | / | / | Press-fit   | Commercial                                               | Goat   | X | X | X | X | Kon, Elizaveta et al. "Reconstruction of Large Osteochondral Defects Using a Hemicondylar Aragonite-Based Implant in a Caprine Model." <i>Arthroscopy : the journal of arthroscopic &amp; related surgery : official publication of the Arthroscopy Association of North America and the International Arthroscopy Association</i> vol. 36,7 (2020): 1884-1894. |
| Biomat only | Monolayer           | /      | Glycopeptide GAG-like                                                   | / | /                                                    | / | / | /           | Malleable                                                | Rabbit | X |   | X |   | Ustun Yaylaci, Seher et al. "Supramolecular GAG-like Self-Assembled Glycopeptide Nanofibers Induce Chondrogenesis and Cartilage Regeneration." <i>Biomacromolecules</i> vol. 17,2 (2016): 679-89.                                                                                                                                                               |
| Biomat only | Monolayer           | /      | /                                                                       | / | Bone ECM + Col or PEG + HPMC                         | / | / | /           | Malleable                                                | Rabbit | X |   | X |   | Giannoni, Paolo et al. "Rheological properties, biocompatibility and in vivo performance of new hydrogel-based bone fillers." <i>Biomaterials science</i> vol. 4,11 (2016): 1691-1703.                                                                                                                                                                          |
| Biomat only | Bilayer             | Biomat | PEG                                                                     | / | BG                                                   | / | / | /           | Molding                                                  | Rabbit | X |   | X | X | Lin, Dan et al. "A viscoelastic PEGylated poly(glycerol sebacate)-based bilayer scaffold for cartilage regeneration in full-thickness osteochondral defect." <i>Biomaterials</i> vol. 253 (2020): 120095.                                                                                                                                                       |
| Biomat only | Bilayer             | Biomat | Alginate + CS + PVA                                                     | / | Alginate + HAP + PVA                                 | / | / | /           | Injection                                                | Rabbit | X | X |   | X | Radhakrishnan, Janani et al. "Gradient nano-engineered in situ forming composite hydrogel for osteochondral regeneration." <i>Biomaterials</i> vol. 162 (2018): 82-98.                                                                                                                                                                                          |
| Biomat only | Monolayer           | /      | Si + CaP                                                                | / | /                                                    | / | / | /           | Other                                                    | Rabbit | X | X |   | X | Bunpetch, Varitsara et al. "Silicate-based bioceramic scaffolds for dual-lineage regeneration of osteochondral defect." <i>Biomaterials</i> vol. 192 (2019): 323-333.                                                                                                                                                                                           |
| Biomat only | Monolayer           | /      | PCL + PSPU-U                                                            | / | /                                                    | / | / | Press-fit   | Commercial                                               | Rat    | X | X | X |   | Shah, Sarav S et al. "Optimization of Degradation Profile for New Scaffold in Cartilage Repair." <i>Cartilage</i> vol. 9,4 (2018): 438-449.                                                                                                                                                                                                                     |
| Biomat only | Monolayer           | /      | AH-MA + PEG-MA                                                          | / | /                                                    | / | / | /           | Molding vs 3D-printing                                   | Rabbit | X | X | X |   | Ma, Kaiwei et al. "Application of robotic-assisted <i>in situ</i> 3D printing in cartilage regeneration with HAMA hydrogel: An <i>in vivo</i> study." <i>Journal of advanced research</i> vol. 23 123-132. 28 Jan. 2020.                                                                                                                                        |
| Biomat only | Bilayer             | Biomat | Col I                                                                   | / | Col I + HAP-Mg or wollastonite or wollastonite + HAP | / | / | Press-fit   | Molding                                                  | Sheep  | X | X |   | X | Gervaso, F et al. "Comparison of three novel biphasic scaffolds for one-stage treatment of osteochondral defects in a sheep model." <i>Journal of biological regulators and homeostatic agents</i> vol. 30,4 Suppl 1 (2016): 24-31.                                                                                                                             |
| Biomat only | Bilayer             | Biomat | Silk fibroin                                                            | / | Silk fibroin                                         | / | / | Press-fit   | Molding                                                  | Rabbit | X | X |   | X | Singh, Yogendra Pratap et al. "Hierarchically structured seamless silk scaffolds for osteochondral interface tissue engineering." <i>Journal of materials chemistry. B</i> vol. 6,36 (2018): 5671-5688.                                                                                                                                                         |
| Biomat only | Monolayer           | /      | Col + Silk fibroin                                                      | / | /                                                    | / | / | /           | Molding                                                  | Rabbit | X |   | X | X | Feng, Xue et al. "Influence of pore architectures of silk fibroin/collagen composite scaffolds on the regeneration of osteochondral defects in vivo." <i>Journal of materials chemistry. B</i> vol. 8,3 (2020): 391-405.                                                                                                                                        |
| Biomat only | Bilayer             | Biomat | Osteochondral grafts of demineralized bone ECM with protected cartilage | / | Bone ECM                                             | / | / | Press-fit   | Other                                                    | Rabbit | ? | ? | ? | ? | Li, Siming et al. "Repair of massively defected hemi-joints using demineralized osteoarticular allografts with protected cartilage." <i>Journal of materials science. Materials in medicine</i> vol. 26,8 (2015): 227.                                                                                                                                          |
| Biomat only | Monolayer           | /      | Gelatin or polyglycerol sebacate                                        | / | /                                                    | / | / | Blood clot  | Undefined                                                | Goat   | X |   | X |   | Chin, Adam R et al. "Regenerative Potential of Various Soft Polymeric Scaffolds in the Temporomandibular Joint Condyle." <i>Journal of oral and maxillofacial surgery : official journal of the American Association of Oral and Maxillofacial Surgeons</i> vol. 76,9 (2018): 2019-2026.                                                                        |
| Biomat only | Bilayer             | Biomat | HA                                                                      | / | Aragonite                                            | / | / | /           | Undefined                                                | Goat   | X | X | X | X | Kon, Elizaveta et al. "Osteochondral regeneration with a novel aragonite-hyaluronate biphasic scaffold: up to 12-month follow-up study in a goat model." <i>Journal of orthopaedic surgery and research</i> vol. 10 81. 28 May. 2015.                                                                                                                           |
| Biomat only | Monolayer           | /      | BG + PLGA                                                               | / | /                                                    | / | / | Press-fit   | Cut                                                      | Rabbit | X | X |   | X | Salonius, Eve et al. "Gas-foamed poly(lactide-co-glycolide) and poly(lactide-co-glycolide) with bioactive glass fibres demonstrate insufficient bone repair in lapine osteochondral defects." <i>Journal of tissue engineering and regenerative medicine</i> vol. 13,3 (2019): 406-415.                                                                         |
| Biomat only | Monolayer           | /      | PLGA                                                                    | / | /                                                    | / | / | /           | Molding                                                  | Rabbit | X | X | X |   | Dai, Yuankun et al. "Regeneration of osteochondral defects in vivo by a cell-free cylindrical poly(lactide-co-glycolide) scaffold with a radially oriented microstructure." <i>Journal of tissue engineering and regenerative medicine</i> vol. 12,3 (2018): e1647-e1661.                                                                                       |
| Biomat only | Monolayer           | /      | GelMA + HA-MA                                                           | / | /                                                    | / | / | /           | Molding                                                  | Rabbit | X | X |   | X | Lin, Hang et al. "Optimization of photocrosslinked gelatin/hyaluronic acid hybrid scaffold for the repair of cartilage defect." <i>Journal of tissue engineering and regenerative medicine</i> vol. 13,8 (2019): 1418-1429.                                                                                                                                     |
| Biomat only | Monolayer           | /      | Cartilage or osteochondral ECM                                          | / | /                                                    | / | / | /           | Cut                                                      | Rabbit | X | X | X |   | Lin, X et al. "Biphasic hierarchical extracellular matrix scaffold for osteochondral defect regeneration." <i>Osteoarthritis and cartilage</i> vol. 26,3 (2018): 433-444.                                                                                                                                                                                       |
| Biomat only | Monolayer           | /      | BG + Pluronic F-127                                                     | / | /                                                    | / | / | /           | 3D-printing                                              | Rabbit | X | X |   | X | Dang, Wentao et al. "3D printing of Mo-containing scaffolds with activated anabolic responses and bi-lineage bioactivities." <i>Theranostics</i> vol. 8,16 4372-4392. 30 Jul. 2018.                                                                                                                                                                             |
| Biomat only | Monolayer           | /      | Alginate + BG + Pluronic F-128                                          | / | /                                                    | / | / | /           | 3D-printing                                              | Rabbit | X | X |   | X | Deng, Cuijun et al. "Bioactive Scaffolds for Regeneration of Cartilage and Subchondral Bone Interface." <i>Theranostics</i> vol. 8,7 1940-1955. 15 Feb. 2018.                                                                                                                                                                                                   |
| Biomat only | Monolayer           | /      | BG-ceramics                                                             | / | /                                                    | / | / | /           | 3D-printing                                              | Rabbit | X | X |   | X | Lin, Rongcai et al. "Copper-incorporated bioactive glass-ceramics inducing anti-inflammatory phenotype and regeneration of cartilage/bone interface." <i>Theranostics</i> vol. 9,21 6300-6313. 14 Aug. 2019.                                                                                                                                                    |
| Biomat only | Bilayer + Monolayer | Biomat | Col I                                                                   | / | Col I + HAP-Mg or wollastonite + HAP                 | / | / | Press-fit   | Molding                                                  | Sheep  |   | X |   |   | Crovace, Alberto M et al. "Evaluation of in Vivo Response of Three Biphasic Scaffolds for Osteochondral Tissue Regeneration in a Sheep Model." <i>Veterinary sciences</i> vol. 6,4 90. 9 Nov. 2019.                                                                                                                                                             |
| Biomat only | Bilayer             | Biomat | Chitosan-Si + HPMC-Si                                                   | / | BCP                                                  | / | / | /           | Injection                                                | Sheep  | X | X | X |   | Ive, Mélanie et al. "Preliminary evaluation of an osteochondral autograft, a prosthetic implant, and a biphasic absorbable implant for osteochondral reconstruction in a sheep model." <i>Veterinary surgery : VS</i> vol. 49,3 (2020): 570-581.                                                                                                                |
| Biomat only | Monolayer           | /      | Alginate + bioceramic + Pluronic F-127                                  | / | /                                                    | / | / | /           | 3D-printing                                              | Rabbit | X | X |   | X | Chen, Lei et al. "3D printing of a lithium-calcium-silicate crystal bioscaffold with dual bioactivities for osteochondral interface reconstruction." <i>Biomaterials</i> vol. 196 (2019): 138-150.                                                                                                                                                              |
| Biomat only | Monolayer           | /      | Alginate + bioceramic + Pluronic F-127                                  | / | /                                                    | / | / | /           | 3D-printing                                              | Rabbit | X | X |   | X | Deng, Cuijun et al. "Bioactive Scaffolds for Regeneration of Cartilage and Subchondral Bone Interface." <i>Theranostics</i> vol. 8,7 1940-1955. 15 Feb. 2018.                                                                                                                                                                                                   |
| Biomat only | Monolayer           | /      | Peptide-based hydrogels + PCL                                           | / | /                                                    | / | / | /           | 3D-printing                                              | Rabbit | X | X |   | X | Li, Lan et al. "3D Molecularly Functionalized Cell-Free Biomimetic Scaffolds for Osteochondral Regeneration." <i>Advanced Functional Materials</i> , 29(6), (2018) 1807356.                                                                                                                                                                                     |

|                    |           |                    |                                           |                |                                          |   |   |                                |             |             |         |   |   |   |   |                                                                                                                                                                                                                                                                                                |                                                                                                                                                                                                                                                                                                                                                 |
|--------------------|-----------|--------------------|-------------------------------------------|----------------|------------------------------------------|---|---|--------------------------------|-------------|-------------|---------|---|---|---|---|------------------------------------------------------------------------------------------------------------------------------------------------------------------------------------------------------------------------------------------------------------------------------------------------|-------------------------------------------------------------------------------------------------------------------------------------------------------------------------------------------------------------------------------------------------------------------------------------------------------------------------------------------------|
| Biomat only        | Trilayer  | Biomat             | Col I                                     | Col I + HAP-Mg | Col I + HAP-Mg                           | / | / | /                              | Undefined   | Rat         | X       | X |   |   |   | Solak, Kazim et al. "Histological Comparison of Nanocomposite Multilayer Biomimetic Scaffold, A Chondral Scaffold, and Microfracture Technique to Repair Experimental Osteochondral Defects in Rats." <i>The Eurasian journal of medicine</i> vol. 52,2 (2020): 145-152.                       |                                                                                                                                                                                                                                                                                                                                                 |
| Biomat only        | Bilayer   | Biomat             | Col + HA                                  | /              | Col 10 + HA + HAP                        | / | / | /                              | Molding     | Rabbit      | X       | X | X | X |   | Liu, KaiQiang et al. "A biomimetic bi-layered tissue engineering scaffolds for osteochondral defects repair." <i>Sci. China Technol. Sci.</i> 64, 793-805 (2021)                                                                                                                               |                                                                                                                                                                                                                                                                                                                                                 |
| Biomat only        | Monolayer | /                  | Chitosan + Col + Fibrin + PCL + PEG       | /              | /                                        | / | / | Tisseel Lyo glue               | Combination | Rabbit      | X       |   | X |   |   | Filová, Eva et al. "Hydrogel Containing Anti-CD44-Labeled Microparticles, Guide Bone Tissue Formation in Osteochondral Defects in Rabbits." <i>Nanomaterials (Basel, Switzerland)</i> vol. 10,8 1504. 31 Jul. 2020.                                                                            |                                                                                                                                                                                                                                                                                                                                                 |
| Biomat only        | Bilayer   | Biomat             | Gellan gum                                | /              | Demineralized bone particles+ gellan gum | / | / | /                              | Molding     | Rabbit      | X       |   | X |   |   | Choi, Joo Hee et al. "Characterization and Potential of a Bilayered Hydrogel of Gellan Gum and Demineralized Bone Particles for Osteochondral Tissue Engineering." <i>ACS applied materials &amp; interfaces</i> vol. 12,31 (2020): 34703-34715.                                               |                                                                                                                                                                                                                                                                                                                                                 |
| Biomat only        | Monolayer | /                  | Peptide-based hydrogels                   | /              | /                                        | / | / | /                              | Injection   | Rabbit      | X       | X | X |   |   | Lv, Xiao et al. "Simultaneous Recruitment of Stem Cells and Chondrocytes Induced by a Functionalized Self-Assembling Peptide Hydrogel Improves Endogenous Cartilage Regeneration." <i>Frontiers in cell and developmental biology</i> vol. 8 864. 27 Aug. 2020.                                |                                                                                                                                                                                                                                                                                                                                                 |
| Biomat only        | Bilayer   | Biomat             | Col + CS                                  | /              | Col + HAP                                | / | / | /                              | Molding     | Rabbit      | X       | X | X | X |   | Zhou, Haichao, et al. "Biphase fish collagen scaffold for osteochondral regeneration." <i>Materials &amp; Design</i> , 195, (2020) 108947. <a href="https://doi.org/10.1016/j.matdes.2020.108947">https://doi.org/10.1016/j.matdes.2020.108947</a>                                             |                                                                                                                                                                                                                                                                                                                                                 |
| Biomat only        | Monolayer | /                  | /                                         | /              | PLGA + Col I or PLGA + HAP               | / | / | /                              | Molding     | Rabbit      | X       | X |   | X |   | Krok-Borkowicz, Małgorzata et al. "Surface-Modified Poly(l-lactide-co-glycolide) Scaffolds for the Treatment of Osteochondral Critical Size Defects-In Vivo Studies on Rabbits." <i>International journal of molecular sciences</i> vol. 21,20 7541. 13 Oct. 2020.                             |                                                                                                                                                                                                                                                                                                                                                 |
| Biomat only        | Bilayer   | Biomat             | GelMa                                     | GelMA + HAP    | /                                        | / | / | /                              | Malleable   | Rabbit      | X       | X | X | X |   | Gao, Jingming et al. "Cell-Free Bilayered Porous Scaffolds for Osteochondral Regeneration Fabricated by Continuous 3D-Printing Using Nascent Physical Hydrogel as Ink." <i>Advanced healthcare materials</i> vol. 10,3 (2021): e2001404.                                                       |                                                                                                                                                                                                                                                                                                                                                 |
| Biomat only        | Monolayer | /                  | ECM                                       | /              | /                                        | / | / | /                              | Malleable   | Rabbit      | X       | X | X | X |   | Wang, Zhifa et al. "Extracellular matrix derived from allogenic decellularized bone marrow mesenchymal stem cell sheets for the reconstruction of osteochondral defects in rabbits." <i>Acta biomaterialia</i> vol. 118 (2020): 54-68.                                                         |                                                                                                                                                                                                                                                                                                                                                 |
| Biomat only        | Monolayer | /                  | Silk fibroin                              | /              | /                                        | / | / | /                              | Cut         | Rabbit      | X       | X | X | X |   | Zhang, Wei et al. "Cell-Free Biomimetic Scaffold with Cartilage Extracellular Matrix-Like Architectures for <i>In Situ</i> Inductive Regeneration of Osteochondral Defects." <i>ACS biomaterials science &amp; engineering</i> vol. 6,12 (2020): 6917-6925.                                    |                                                                                                                                                                                                                                                                                                                                                 |
| Biomat only        | Bilayer   | Biomat             | CS + silk fibroin                         | /              | CS + silk fibroin + HAP                  | / | / | /                              | Molding     | Rat         | X       | X | X | X |   | Shang, Lingling et al. "Nanotextured silk fibroin/hydroxyapatite biomimetic bilayer tough structure regulated osteogenic/chondrogenic differentiation of mesenchymal stem cells for osteochondral repair." <i>Cell proliferation</i> vol. 53,11 (2020): e12917.                                |                                                                                                                                                                                                                                                                                                                                                 |
| Biomat only        | Bilayer   | Biomat             | Chitosan                                  | /              | b-TCP + chitosan                         | / | / | /                              | Cut         | Rat         | X       | X | X | X |   | Xu, Dongdong et al. "Bi-layered Composite Scaffold for Repair of the Osteochondral Defects." <i>Advances in wound care</i> vol. 10,8 (2021): 401-414.                                                                                                                                          |                                                                                                                                                                                                                                                                                                                                                 |
| Biomat only        | Monolayer | /                  | Gelatin + GelMA + oxidized dextran        | /              | /                                        | / | / | /                              | Injection   | Rabbit      | X       | X | X |   | X | Zhou, Feifei et al. "Tough hydrogel with enhanced tissue integration and in situ forming capability for osteochondral defect repair." <i>Applied Materials Today</i> , 13, (2018) 32-44.                                                                                                       |                                                                                                                                                                                                                                                                                                                                                 |
| Biomat only        | Bilayer   | Biomat             | Cartilage ECM                             | /              | Bone ECM                                 | / | / | /                              | Molding     | Rabbit      | X       | X | X | X |   | Cao, Runfeng et al. "A Biomimetic Biphasic Scaffold Consisting of Decellularized Cartilage and Decalcified Bone Matrices for Osteochondral Defect Repair." <i>Frontiers in cell and developmental biology</i> vol. 9 639006. 19 Feb. 2021.                                                     |                                                                                                                                                                                                                                                                                                                                                 |
| Biomat only        | Monolayer | /                  | Silk fibroin + peptide elastin-like       | /              | /                                        | / | / | /                              | Undefined   | Rabbit      | X       | X | X | X | X | Chen, Zhuoyue et al. "Elastin-like polypeptide modified silk fibroin porous scaffold promotes osteochondral repair." <i>Bioactive materials</i> vol. 6,3 589-601. 18 Sep. 2020.                                                                                                                |                                                                                                                                                                                                                                                                                                                                                 |
| Biomat only        | Monolayer | /                  | Chitosan + PHB                            | /              | /                                        | / | / | /                              | Undefined   | Goat        | X       | X |   | X |   | Petrovova, Eva et al. "PHB/CHIT Scaffold as a Promising Biopolymer in the Treatment of Osteochondral Defects-An Experimental Animal Study." <i>Polymers</i> vol. 13,8 1232. 11 Apr. 2021.                                                                                                      |                                                                                                                                                                                                                                                                                                                                                 |
| Biomat only        | Monolayer | /                  | Cartilage ECM particles + Chitosan + PLGA | /              | /                                        | / | / | /                              | Molding     | Rabbit      | X       | X | X |   |   | Shen, Yanbing et al. "Engineering a Highly Biomimetic Chitosan-Based Cartilage Scaffold by Using Short Fibers and a Cartilage-Decellularized Matrix." <i>Biomacromolecules</i> vol. 22,5 (2021): 2284-2297.                                                                                    |                                                                                                                                                                                                                                                                                                                                                 |
| Biomat only        | Monolayer | /                  | HA                                        | /              | /                                        | / | / | /                              | Injection   | Rat         | X       | X | X |   |   | Chen, Jiaqing et al. "Modified hyaluronic acid hydrogels with chemical groups that facilitate adhesion to host tissues enhance cartilage regeneration." <i>Bioactive materials</i> vol. 6,6 1689-1698. 29 Nov. 2020.                                                                           |                                                                                                                                                                                                                                                                                                                                                 |
| Biomat only        | Bilayer   | Biomat             | Col II + CS + PVA                         | /              | BCP + carbon nanotube + PVA              | / | / | /                              | Molding     | Rabbit      | X       | X | X | X | X | Lan, Weiwei et al. "Physicochemical properties and biocompatibility of the bi-layer polyvinyl alcohol-based hydrogel for osteochondral tissue engineering." <i>Materials &amp; Design</i> , 204, (2021) 109652.                                                                                |                                                                                                                                                                                                                                                                                                                                                 |
| Biomat only        | Monolayer | /                  | Silk-naNosilicate                         | /              | /                                        | / | / | /                              | Undefined   | Rabbit      | X       | X | X | X |   | Zhang, Wei et al. "Enzymatically crosslinked silk-nanosilicate reinforced hydrogel with dual-lineage bioactivity for osteochondral tissue engineering." <i>Materials science &amp; engineering. C, Materials for biological applications</i> vol. 127 (2021): 112215.                          |                                                                                                                                                                                                                                                                                                                                                 |
| Biomat only        | Trilayer  | Biomat             | CS + PLCL                                 | PLCL           | BG + PLCL                                | / | / | /                              | Undefined   | Rabbit      | X       | X |   | X |   | Liu, Mengtao et al. "Artificial osteochondral interface of bioactive fibrous membranes mediating calcified cartilage reconstruction." <i>Journal of materials chemistry. B</i> vol. 9,37 7782-7792. 29 Sep. 2021.                                                                              |                                                                                                                                                                                                                                                                                                                                                 |
| Biomat only        | Monolayer | /                  | PVA                                       | /              | /                                        | / | / | /                              | Commercial  | Sheep       | X       | X | X | X |   | Cercone, Marta et al. "Early Failure of a Polyvinyl Alcohol Hydrogel Implant With Osteolysis and Foreign Body Reactions in an Ovine Model of Cartilage Repair." <i>The American journal of sports medicine</i> vol. 49,12 (2021): 3395-3403.                                                   |                                                                                                                                                                                                                                                                                                                                                 |
| Biomat only        | Bilayer   | Biomat             | Col + PLGA                                | Titanium alloy | /                                        | / | / | /                              | 3D-printing | Rabbit      | X       | X |   | X | X | Yang, Tao et al. "Bilayered scaffold with 3D printed stiff subchondral bony compartment to provide constant mechanical support for long-term cartilage regeneration." <i>Journal of orthopaedic translation</i> vol. 30 112-121. 12 Oct. 2021.                                                 |                                                                                                                                                                                                                                                                                                                                                 |
| Biomat only        | Monolayer | /                  | Cartilage ECM                             | /              | /                                        | / | / | /                              | Undefined   | Rabbit      | X       | X | X |   |   | Chu, Wenhui et al. "The use of a novel deer antler decellularized cartilage-derived matrix scaffold for repair of osteochondral defects." <i>Journal of biological engineering</i> vol. 15,1 23. 3 Sep. 2021.                                                                                  |                                                                                                                                                                                                                                                                                                                                                 |
| Biomat only        | Bilayer   | Biomat             | Acryloyl glucosamine + GelMA              | /              | Vinylphosphonic acid                     | / | / | /                              | Molding     | Rabbit      | X       | X | X | X |   | Chen, Zhuoxin et al. "Heterogenous hydrogel mimicking the osteochondral ECM applied to tissue regeneration." <i>Journal of materials chemistry. B</i> vol. 9,41 8646-8658. 27 Oct. 2021.                                                                                                       |                                                                                                                                                                                                                                                                                                                                                 |
| Biomat only        | Bilayer   | Biomat             | Gellan Gum+alginate                       | /              | Gellan gum + HAP                         | / | / | /                              | Molding     | Rabbit      | X       | X | X | X | X | Xing, Jiaqi et al. "Gellan gum/alginate-based Ca-enriched acellular bilayer hydrogel with robust interface bonding for effective osteochondral repair." <i>Carbohydrate polymers</i> vol. 270 (2021): 118382.                                                                                  |                                                                                                                                                                                                                                                                                                                                                 |
| Biomat only        | Monolayer | /                  | Col + CS                                  | /              | /                                        | / | / | /                              | Molding     | Rabbit      | X       | X |   |   |   | Bauza-Mayol, Guillermo et al. "Biomimetic Scaffolds Modulate the Posttraumatic Inflammatory Response in Articular Cartilage Contributing to Enhanced Neof ormation of Cartilaginous Tissue In Vivo." <i>Advanced healthcare materials</i> , e2101127. 18 Oct. 2021.                            |                                                                                                                                                                                                                                                                                                                                                 |
| Biomat + biologics | Monolayer | /                  | CaP                                       | /              | /                                        | / | / | Amino acids                    | Malleable   | Sheep       | X       | X | X | X |   | Kresakova, Lenka et al. "In Vivo Study of Osteochondral Defect Regeneration Using Innovative Composite Calcium Phosphate Biocement in a Sheep Model." <i>Materials (Basel, Switzerland)</i> vol. 14,16 4471. 10 Aug. 2021. doi:10.3390/ma14164471                                              |                                                                                                                                                                                                                                                                                                                                                 |
| Biomat + biologics | Monolayer | /                  | Gelatin + silk fibroin                    | /              | /                                        | / | / | SDF-1, TGF-b1                  | Press-fit   | Cut         | Rat     | X | X | X |   | Chen, Yuanfeng et al. "Sustained Release SDF-1 $\alpha$ /TGF- $\beta$ 1-Loaded Silk Fibroin-Porous Gelatin Scaffold Promotes Cartilage Repair." <i>ACS applied materials &amp; interfaces</i> vol. 11,16 (2019): 14608-14618.                                                                  |                                                                                                                                                                                                                                                                                                                                                 |
| Biomat + biologics | Monolayer | /                  | PLGA microspheres + agarose               | /              | /                                        | / | / | Dexamethasone                  | Press-fit   | Punch       | Dog     | X | X |   |   | Stefani, Robert M et al. "Sustained low-dose dexamethasone delivery via a PLGA microsphere-embedded agarose implant for enhanced osteochondral repair." <i>Acta biomaterialia</i> vol. 102 (2020): 326-340.                                                                                    |                                                                                                                                                                                                                                                                                                                                                 |
| Biomat + biologics | Bilayer   | Biomat             | GelMA                                     | /              | GelMA + HAP                              | / | / | BMP-2, TGF-b3                  | /           | Molding     | Rabbit  | X | X |   |   | Gan, Donglin et al. "Mussel-Inspired Tough Hydrogel with In Situ Nanohydroxyapatite Mineralization for Osteochondral Defect Repair." <i>Advanced healthcare materials</i> vol. 8,22 (2019): e1901103.                                                                                          |                                                                                                                                                                                                                                                                                                                                                 |
| Biomat + biologics | Monolayer | /                  | Pluronic F-127                            | /              | /                                        | / | / | Adeno-Associated Viral Vectors | /           | Injection   | Minipig | X | X | X | X | Madry, Henning et al. "Thermosensitive Hydrogel Based on PEO-PPO-PEO Poloxamers for a Controlled In Situ Release of Recombinant Adeno-Associated Viral Vectors for Effective Gene Therapy of Cartilage Defects." <i>Advanced materials (Deerfield Beach, Fla.)</i> vol. 32,2 (2020): e1906508. |                                                                                                                                                                                                                                                                                                                                                 |
| Biomat + biologics | Bilayer   | Biomat + biologics | Alginate                                  | /              | Graphene oxide                           | / | / | Aptamer, kartogenin            | /           | Other       | Rat     | X |   | X | X | Hu, Xiaoxia et al. "A Difunctional Regeneration Scaffold for Knee Repair based on Aptamer-Directed Cell Recruitment." <i>Advanced materials (Deerfield Beach, Fla.)</i> vol. 29,15 (2017): 10.1002/adma.201605235.                                                                             |                                                                                                                                                                                                                                                                                                                                                 |
| Biomat + biologics | Monolayer | /                  | Col I                                     | /              | /                                        | / | / | SDF-1                          | /           | Molding     | Rabbit  | X | X | X |   | X                                                                                                                                                                                                                                                                                              | Chen, Pengfei et al. "Radially oriented collagen scaffold with SDF-1 promotes osteochondral repair by facilitating cell homing." <i>Biomaterials</i> vol. 39 (2015): 114-23.                                                                                                                                                                    |
| Biomat + biologics | Monolayer | /                  | PEOT + PBT                                | /              | /                                        | / | / | TGF-b1                         | /           | Molding     | Minipig | X | X | X | X |                                                                                                                                                                                                                                                                                                | Asen, Ann-Kathrin et al. "Sustained spatiotemporal release of TGF- $\beta$ 1 confers enhanced very early chondrogenic differentiation during osteochondral repair in specific topographic patterns." <i>FASEB journal : official publication of the Federation of American Societies for Experimental Biology</i> vol. 32,10 (2018): 5298-5311. |
| Biomat + biologics | Monolayer | /                  | GelMA + cartilage ECM                     | /              | /                                        | / | / | Exosomes                       | /           | 3D-printing | Rabbit  | X | X |   | X |                                                                                                                                                                                                                                                                                                | Chen, Pengfei et al. "Desktop-stereolithography 3D printing of a radially oriented extracellular matrix/mesenchymal stem cell exosome bioink for osteochondral defect regeneration." <i>Theranostics</i> vol. 9,9 2439-2459. 13 Apr. 2019.                                                                                                      |
| Biomat + biologics | Monolayer | /                  | HA + silk fibroin                         | /              | /                                        | / | / | Aptamer                        | /           | Molding     | Rabbit  | X | X | X |   |                                                                                                                                                                                                                                                                                                | Wang, Xin et al. "Aptamer-Functionalized Bioscaffold Enhances Cartilage Repair by Improving Stem Cell Recruitment in Osteochondral Defects of Rabbit Knees." <i>The American journal of sports medicine</i> vol. 47,10 (2019): 2316-2326.                                                                                                       |
| Biomat + biologics | Monolayer | /                  | PLGA                                      | /              | /                                        | / | / | PRP                            | Press-fit   | Molding     | Rabbit  | X | X | X | X |                                                                                                                                                                                                                                                                                                | Chang, Nai-Jen et al. "Therapeutic Effects of the Addition of Platelet-Rich Plasma to Biomaterials and Early Rehabilitation Exercise on Articular Cartilage Repair." <i>The American journal of sports medicine</i> vol. 46,9 (2018): 2232-2241.                                                                                                |

|                    |             |                    |                                       |                                               |                                                                            |   |                                                  |                             |                                     |              |   |   |   |   |                                                                                                                                                                                                                                                                                                                  |
|--------------------|-------------|--------------------|---------------------------------------|-----------------------------------------------|----------------------------------------------------------------------------|---|--------------------------------------------------|-----------------------------|-------------------------------------|--------------|---|---|---|---|------------------------------------------------------------------------------------------------------------------------------------------------------------------------------------------------------------------------------------------------------------------------------------------------------------------|
| Biomat + biologics | Monolayer   | /                  | Col + HAP                             | /                                             | /                                                                          | / | BMP-2                                            | /                           | Cut                                 | Rabbit       | X |   | X | X | Taniyama, Takashi et al. "Repair of osteochondral defects in a rabbit model using a porous hydroxyapatite collagen composite impregnated with bone morphogenetic protein-2." <i>Artificial organs</i> vol. 39,6 (2015): 529-35.                                                                                  |
| Biomat + biologics | Quadrilayer | Biomat + biologics | Alginate + chitosan                   | Alginate + chitosan + HAP                     | Alginate + PCL + PEG + HAP                                                 | / | BMP-2, FGF-2, TGF-b1                             | /                           | Electrospinning + Molding           | Rabbit       | X |   | X | X | Chen, Tajjun et al. "A single integrated osteochondral in situ composite scaffold with a multi-layered functional structure." <i>Colloids and surfaces. B, Biointerfaces</i> vol. 167 (2018): 354-363.                                                                                                           |
| Biomat + biologics | Monolayer   | /                  | Gelatin                               | /                                             | /                                                                          | / | IGF-1                                            | Press-fit                   | Commercial                          | Rat          | X | X |   |   | Alemdar, Celil et al. "Effect of insulin-like growth factor-1 and hyaluronic acid in experimentally produced osteochondral defects in rats." <i>Indian journal of orthopaedics</i> vol. 50,4 (2016): 414-20.                                                                                                     |
| Biomat + biologics | Monolayer   | /                  | HA-MA + HAP + PCL + PEG               | /                                             | /                                                                          | / | TGF-b1                                           | /                           | 3D-printing                         | Minipig      | X | X |   | X | Hsieh, Yi-Ho et al. "Healing of Osteochondral Defects Implanted with Biomimetic Scaffolds of Poly(ε-Caprolactone)/Hydroxyapatite and Glycidyl-Methacrylate-Modified Hyaluronic Acid in a Minipig." <i>International journal of molecular sciences</i> vol. 19,4 1125. 9 Apr. 2018                                |
| Biomat + biologics | Bilayer     | Biomat + biologics | Cellulose + GAG                       | /                                             | Cellulose + HAP                                                            | / | BMP-2, TGF-b3                                    | Press-fit                   | Undefined                           | Rat          | X | X |   | X | Kumbhar, Jyoti V et al. "In vitro and in vivo studies of a novel bacterial cellulose-based acellular bilayer nanocomposite scaffold for the repair of osteochondral defects." <i>International journal of nanomedicine</i> vol. 12 6437-6459. 1 Sep. 2017.                                                       |
| Biomat + biologics | Monolayer   | /                  |                                       | /                                             | Porous tantalum                                                            | / | BMP-2                                            | /                           | Molding                             | Rabbit       | X |   |   | X | Wang, Qian et al. "Application of combined porous tantalum scaffolds loaded with bone morphogenetic protein 7 to repair of osteochondral defect in rabbits." <i>International orthopaedics</i> vol. 42,7 (2018): 1437-1448.                                                                                      |
| Biomat + biologics | Monolayer   | /                  | Col                                   | /                                             | /                                                                          | / | TGF-b1                                           | Press-fit                   | Molding                             | Rabbit       | X |   | X |   | Maruki, Hideyuki et al. "Effects of a cell-free method using collagen vitrigel incorporating TGF-β1 on articular cartilage repair in a rabbit osteochondral defect model." <i>Journal of biomedical materials research. Part B, Applied biomaterials</i> vol. 105,8 (2017): 2592-2602.                           |
| Biomat + biologics | Monolayer   | /                  | Peptide-based hydrogels               | /                                             | /                                                                          | / | IGF-1, PDGF                                      | /                           | Malleable                           | Rabbit       | X | X | X |   | Zanotto, Gustavo et al. "Trypsin Pre-Treatment Combined With Growth Factor Functionalized Self-Assembling Peptide Hydrogel Improves Cartilage Repair in Rabbit Model." <i>Journal of orthopaedic research : official publication of the Orthopaedic Research Society</i> vol. 37,11 (2019): 2307-2315.           |
| Biomat + biologics | Monolayer   | /                  | Gellan gum                            | /                                             | /                                                                          | / | Tenascin-C                                       | /                           | Punch                               | Rabbit       | X | X | X |   | Ikemura, Shigeto et al. "Effect of tenascin-C on the repair of full-thickness osteochondral defects of articular cartilage in rabbits." <i>Journal of orthopaedic research : official publication of the Orthopaedic Research Society</i> vol. 33,4 (2015): 563-71.                                              |
| Biomat + biologics | Bilayer     | Biologics          | Alginate                              | /                                             | Alginate                                                                   | / | BMP-4, TGF-b1                                    | /                           | Injection                           | Minipig      | X | X | X | X | Ruvinov, Emil et al. "Articular cartilage regeneration using acellular bioactive affinity-binding alginate hydrogel: A 6-month study in a mini-pig model of osteochondral defects." <i>Journal of orthopaedic translation</i> vol. 16 40-52. 9 Sep. 2018.                                                        |
| Biomat + biologics | Monolayer   | /                  | Gelatin + silk fibroin                | /                                             | /                                                                          | / | Ginsenoside Rb1, TGF-b1                          | /                           | Cut                                 | Rat          | X | X | X |   | Wu, Tingting et al. "Ginsenoside Rb1/TGF-β1 loaded biodegradable silk fibroin-gelatin porous scaffolds for inflammation inhibition and cartilage regeneration." <i>Materials science &amp; engineering. C, Materials for biological applications</i> vol. 111 (2020): 110757.                                    |
| Biomat + biologics | Monolayer   | /                  | Alginate + HA                         | /                                             | /                                                                          | / | Berberine                                        | /                           | Undefined                           | Rat          | X | X | X |   | Chen, Pengfei et al. "Interpenetrating polymer network scaffold of sodium hyaluronate and sodium alginate combined with berberine for osteochondral defect regeneration." <i>Materials science &amp; engineering. C, Materials for biological applications</i> vol. 91 (2018): 190-200.                          |
| Biomat + biologics | Bilayer     | Biomat             | PLGA                                  | /                                             | PLGA                                                                       | / | PRP                                              | /                           | Molding                             | Rabbit       | X | X | X | X | Zhang, Yong-Tao et al. "Repair of Osteochondral Defects in a Rabbit Model Using Bilayer Poly(Lactide-co-Glycolide) Scaffolds Loaded with Autologous Platelet-Rich Plasma." <i>Medical science monitor : international medical journal of experimental and clinical research</i> vol. 23 5189-5201. 31 Oct. 2017. |
| Biomat + biologics | Monolayer   | /                  | HA-MA                                 | /                                             | /                                                                          | / | Autologous PRP                                   | /                           | Injection                           | Minipig      | X | X | X | X | Yan, Wenqiang et al. "Platelet-rich plasma combined with injectable hyaluronic acid hydrogel for porcine cartilage regeneration: a 6-month follow-up." <i>Regenerative biomaterials</i> vol. 7,1 (2020): 77-90.                                                                                                  |
| Biomat + biologics | Bilayer     | /                  | CS + PLGA                             | /                                             | b-TCP + PLGA                                                               | / | IGF-1, TGF-b3                                    | Press-fit                   | Molding                             | Sheep        | X | X |   | X | Mohan, Neethu et al. "Microsphere-based gradient implants for osteochondral regeneration: a long-term study in sheep." <i>Regenerative medicine</i> vol. 10,6 (2015): 709-28.                                                                                                                                    |
| Biomat + biologics | Bilayer     | Biomat + biologics | Gelatin + OPF                         | /                                             | Gelatin + OPF                                                              | / | BMP-2, IGF-1                                     | /                           | Molding                             | Rabbit       | X |   |   | X | Lu, Steven et al. "Technical Report: Correlation Between the Repair of Cartilage and Subchondral Bone in an Osteochondral Defect Using Bilayered, Biodegradable Hydrogel Composites." <i>Tissue engineering. Part C, Methods</i> vol. 21,12 (2015): 1216-25.                                                     |
| Biomat + biologics | Trilayer    | Biomat + biologics | CS + glycidyl-MA + PEGD-MA            | CS + glycidyl-MA + PEGD-MA                    | CS + glycidyl-MA + PEGD-MA+ octoviny polyhedral oligomeric silsesquioxanes | / | TGF-b1                                           | /                           | Molding                             | Rabbit       | X | X |   |   | Han, Fengxuan et al. "Photocrosslinked layered gelatin-chitosan hydrogel with graded compositions for osteochondral defect repair." <i>Journal of materials science. Materials in medicine</i> vol. 26,4 (2015): 160.                                                                                            |
| Biomat + biologics | Bilayer     | Biomat             | PLCL                                  | /                                             | b-TCP + PLA                                                                | / | IL-8, MIP-3a                                     | Press-fit                   | Molding                             | Dog          | X | X |   | X | Park, Min Sung et al. "In Situ Recruitment of Human Bone Marrow-Derived Mesenchymal Stem Cells Using Chemokines for Articular Cartilage Regeneration." <i>Cell transplantation</i> vol. 24,6 (2015): 1067-83.                                                                                                    |
| Biomat + biologics | Monolayer   | /                  | Dentin ECM                            | /                                             | /                                                                          | / | Alendronate                                      | /                           | Malleable                           | Rabbit       | X | X |   | X | Yasuda, Atsushi et al. "Experimental study of influence of direct bisphosphonate administration on bone substitute." <i>Dental materials journal</i> vol. 34,6 (2015): 789-95.                                                                                                                                   |
| Biomat + biologics | Trilayer    | Biomat             | Alginate + chitosan + polyelectrolyte | Alginate + b-TCP + chitosan + polyelectrolyte | Alginate + b-TCP + chitosan + polyelectrolyte                              | / | Dexamethasone                                    | /                           | Molding                             | Rat          | X |   |   |   | Algul, Derya et al. "In vitro release and In vivo biocompatibility studies of biomimetic multilayered alginate-chitosan/β-TCP scaffold for osteochondral tissue." <i>Journal of biomaterials science. Polymer edition</i> vol. 27,5 (2016): 431-40.                                                              |
| Biomat + biologics | Monolayer   | /                  | Chitosan                              | /                                             | /                                                                          | / | Peptides                                         | Press-fit                   | Undefined                           | Rabbit       | X | X | X |   | Chen, Jiaqing et al. "TGF-β1 affinity peptides incorporated within a chitosan sponge scaffold can significantly enhance cartilage regeneration." <i>Journal of materials chemistry. B</i> vol. 6,4 (2018): 675-687.                                                                                              |
| Biomat + biologics | Monolayer   | /                  | PRF + cartilage fragments             | /                                             | /                                                                          | / | PRF                                              | Press-fit + periosteal flap | Malleable                           | Minipig      | X | X |   |   | Sheu, S Y et al. "The effect of platelet-rich fibrin on autologous osteochondral transplantation: An in vivo porcine model." <i>The Knee</i> vol. 24,6 (2017): 1392-1401.                                                                                                                                        |
| Biomat + biologics | Monolayer   | /                  | PRF                                   | /                                             | /                                                                          | / | PRF                                              | /                           | Injection                           | Rabbit       | X | X |   |   | Abd El Raouf, Mustafa et al. "Injectable-platelet rich fibrin using the low speed centrifugation concept improves cartilage regeneration when compared to platelet-rich plasma." <i>Platelets</i> vol. 30,2 (2019): 213-221.                                                                                     |
| Biomat + biologics | Bilayer     | Biomat + biologics | Glycidyl acid-MA + HA-MA + PCL + PEG  | /                                             | HAP + PCL + PEG                                                            | / | TGF-b1                                           | /                           | 3D-printing                         | Rabbit       | X |   |   |   | Hsieh, Yi-Ho et al. "Osteochondral Regeneration Induced by TGF-β Loaded Photo Cross-Linked Hyaluronic Acid Hydrogel Infiltrated in Fused Deposition-Manufactured Composite Scaffold of Hydroxyapatite and Poly (Ethylene Glycol)-Block-Poly(ε-Caprolactone)." <i>Polymers</i> vol. 9,5 182. 20 May. 2017.        |
| Biomat + biologics | Bilayer     | Biomat + biologics | PNAGA                                 | /                                             | PNAGA + b-TCP                                                              | / | TGF-b1                                           | /                           | 3D-printing                         | Rat          | X |   | X | X | Gao, Fei., et al. "Direct 3D Printing of High Strength Biohybrid Gradient Hydrogel Scaffolds for Efficient Repair of Osteochondral Defect." <i>Advanced Functional Materials</i> , 28(13), (2018):1706644.                                                                                                       |
| Biomat + biologics | Bilayer     | Biomat + biologics | Alginate + glycol chitosan + PEO      | /                                             | Alginate + BG + glycol chitosan + PEO                                      | / | TGF-b1                                           | /                           | Molding                             | Rabbit       | X | X | X | X | Liu, Bingchuan et al. "Biphasic Double-Network Hydrogel With Compartmentalized Loading of Bioactive Glass for Osteochondral Defect Repair." <i>Frontiers in bioengineering and biotechnology</i> vol. 8 752. 2 Jul. 2020.                                                                                        |
| Biomat + biologics | Monolayer   | /                  | Col                                   | /                                             | /                                                                          | / | Wnt5a                                            | /                           | Molding                             | Rabbit       | X | X | X |   | Qi, Yiyang et al. "An oriented-collagen scaffold including Wnt5a promotes osteochondral regeneration and cartilage interface integration in a rabbit model." <i>FASEB journal : official publication of the Federation of American Societies for Experimental Biology</i> vol. 34,8 (2020): 11115-11132.         |
| Biomat + biologics | Monolayer   | /                  | Alginate                              | /                                             | /                                                                          | / | Peptides                                         | /                           | Undefined                           | Rabbit       | X | X |   | X | Wei Zhang et al. "Tannic acid-mediated dual peptide-functionalized scaffolds to direct stem cell behavior and osteochondral regeneration." <i>Chemical Engineering Journal</i> , 396, (2020) 125232.                                                                                                             |
| Biomat + biologics | Monolayer   | /                  | Cartilage ECM + PEG                   | /                                             | /                                                                          | / | Honokiol                                         | /                           | 3D-printing                         | Rat          | X | X | X | X | Zhu, Shouan et al. "3D-Printed Extracellular Matrix/Polyethylene Glycol Diacrylate Hydrogel Incorporating the Anti-inflammatory Phytomolecule Honokiol for Regeneration of Osteochondral Defects." <i>The American journal of sports medicine</i> vol. 48,11 (2020): 2808-2818.                                  |
| Biomat + biologics | Monolayer   | /                  | Col I                                 | /                                             | /                                                                          | / | Agrin                                            | /                           | Injection (mouse) Malleable (sheep) | Mouse, sheep | X |   |   | X | Eldridge, Suzanne E et al. "Agrin induces long-term osteochondral regeneration by supporting repair morphogenesis." <i>Science translational medicine</i> vol. 12,559 (2020): eaax9086.                                                                                                                          |
| Biomat + biologics | Monolayer   | /                  | Silk fibroin                          | /                                             | /                                                                          | / | Kartogenin, peptides                             | /                           | Undefined                           | Rabbit       | X | X | X | X | Zhang, Wei et al. "An all-silk-derived functional nanosphere matrix for sequential biomolecule delivery and in situ osteochondral regeneration." <i>Bioactive materials</i> vol. 5,4 832-843. 23 Jun. 2020.                                                                                                      |
| Biomat + biologics | Monolayer   | /                  | AH + PLGA                             | /                                             | /                                                                          | / | Kartogenin                                       | /                           | Injection                           | Minipig      | X | X | X | X | Yan, Wenqiang et al. "An Injectable Hydrogel Scaffold With Kartogenin-Encapsulated Nanoparticles for Porcine Cartilage Regeneration: A 12-Month Follow-up Study." <i>The American journal of sports medicine</i> vol. 48,13 (2020): 3233-3244.                                                                   |
| Biomat + biologics | Bilayer     | Biomat + biologics | GelMA                                 | /                                             | HAP + PCL                                                                  | / | IL-4                                             | /                           | 3D-printing                         | Rabbit       | X | X | X | X | Gong, Lin et al. "An interleukin-4-loaded bi-layer 3D printed scaffold promotes osteochondral regeneration." <i>Acta biomaterialia</i> vol. 117 (2020): 246-260.                                                                                                                                                 |
| Biomat + biologics | Monolayer   | /                  | Chitosan                              | /                                             | /                                                                          | / | Icariin-conditioned serum                        | /                           | Injection                           | Rabbit       | X | X | X |   | Zhang, Juntao et al. "Repair of osteochondral defect using icariin-conditioned serum combined with chitosan in rabbit knees." <i>BMC complementary medicine and therapies</i> vol. 20,1 193. 22 Jun. 2020.                                                                                                       |
| Biomat + biologics | Monolayer   | /                  | HA                                    | /                                             | /                                                                          | / | Adipose tissue-derived stromal vascular fraction | /                           | Cut                                 | Rabbit       | X | X |   |   | Sahin, Abdullah Alper et al. "Effects of adipose tissue-derived stromal vascular fraction on osteochondral defects treated by hyaluronic acid-based scaffold: An experimental study." <i>Joint diseases and related surgery</i> vol. 32,2 (2021): 347-354.                                                       |
| Biomat + biologics | Monolayer   | /                  | Col + gelatin                         | /                                             | /                                                                          | / | SDF-1                                            | /                           | Commercial                          | Rat          | X |   |   |   | Mustapich, Taylor et al. "A Novel Strategy to Enhance Microfracture Treatment With Stromal Cell-Derived Factor-1 in a Rat Model." <i>Frontiers in cell and developmental biology</i> vol. 8 595932. 4 Feb. 2021.                                                                                                 |
| Biomat + biologics | Monolayer   | /                  | PRP                                   | /                                             | /                                                                          | / | PRP                                              | /                           | Malleable                           | Rabbit       | X | X | X |   | Slimi, Fathia et al. "The effectiveness of platelet-rich plasma gel on full-thickness cartilage defect repair in a rabbit model." <i>Bone &amp; joint research</i> vol. 10,3 (2021): 192-202.                                                                                                                    |

|                    |           |                |                                                      |                                                      |                                                      |                                                                 |                     |                         |                       |         |   |   |   |   |                                                                                                                                                                                                                                                                                                                              |
|--------------------|-----------|----------------|------------------------------------------------------|------------------------------------------------------|------------------------------------------------------|-----------------------------------------------------------------|---------------------|-------------------------|-----------------------|---------|---|---|---|---|------------------------------------------------------------------------------------------------------------------------------------------------------------------------------------------------------------------------------------------------------------------------------------------------------------------------------|
| Biomat + biologics | Monolayer | /              | Alginate                                             | /                                                    | /                                                    | /                                                               | rAAV-mediated IGF-1 | /                       | Undefined             | Minipig | X | X | X |   | Maihöfer, Johanna et al. "Hydrogel-Guided, rAAV-Mediated IGF-1 Overexpression Enables Long-Term Cartilage Repair and Protection against Perifocal Osteoarthritis in a Large-Animal Full-Thickness Chondral Defect Model at One Year In Vivo." <i>Advanced materials (Deerfield Beach, Fla.)</i> vol. 33,16 (2021): e2008451. |
| Biomat + biologics | Monolayer | /              | GelMA                                                | /                                                    | /                                                    | /                                                               | Histatin-1          | /                       | Injection             | Rabbit  | X | X | X |   | Shi, Changqing et al. "Human Salivary Histatin-1-Functionalized Gelatin Methacrylate Hydrogels Promote the Regeneration of Cartilage and Subchondral Bone in Temporomandibular Joints." <i>Pharmaceuticals (Basel, Switzerland)</i> vol. 14,5 484. 19 May. 2021.                                                             |
| Biomat + biologics | Monolayer | /              | Cartilage ECM                                        | /                                                    | /                                                    | /                                                               | IGF-1               | /                       | Undefined             | Rabbit  | X | X |   | X | Das, Piyali et al. "Decellularized xenogenic cartilage extracellular matrix (ECM) scaffolds for the reconstruction of osteochondral defects in rabbits." <i>Journal of materials chemistry. B</i> vol. 9,24 (2021): 4873-4894                                                                                                |
| Biomat + biologics | Monolayer | /              | Cartilage ECM                                        | /                                                    | /                                                    | /                                                               | IL-4                | /                       | Molding               | Rat     | X | X | X |   | Tian, Guangzhao et al. "Cell-free decellularized cartilage extracellular matrix scaffolds combined with interleukin 4 promote osteochondral repair through immunomodulatory macrophages: In vitro and in vivo preclinical study." <i>Acta biomaterialia</i> vol. 127 (2021): 131-145.                                        |
| Biomat + biologics | Monolayer | /              | Peptide-based hydrogels                              | /                                                    | /                                                    | /                                                               | IGF-1, PDGF         | /                       | Malleable             | Horse   | X | X | X | X | Zanotto, Gustavo M et al. "Microfracture Augmentation With Trypsin Pretreatment and Growth Factor-Functionalized Self-assembling Peptide Hydrogel Scaffold in an Equine Model." <i>The American journal of sports medicine</i> vol. 49,9 (2021): 2498-2508.                                                                  |
| Biomat + biologics | Monolayer | /              | GelMA                                                | /                                                    | /                                                    | /                                                               | PRP                 | /                       | Undefined             | Rabbit  | X | X | X | X | Jiang, Guangyao et al. "A 3D-printed PRP-GelMA hydrogel promotes osteochondral regeneration through M2 macrophage polarization in a rabbit model." <i>Acta biomaterialia</i> vol. 128 (2021): 150-162.                                                                                                                       |
| Biomat + biologics | Bilayer   | Biomat         | β-glycérophosphate + chitosan                        | Hydroxide chitosan                                   | /                                                    | /                                                               | Peptides            | /                       | Molding               | Rabbit  | X | X | X | X | Liu, Pei. "Biphasic CK2.1-coated β-glycérophosphate chitosan/LL37-modified layered double hydroxide chitosan composite scaffolds enhance coordinated hyaline cartilage and subchondral bone regeneration." <i>Chemical Engineering Journal</i> , 418,(2021) 129531.                                                          |
| Biomat + biologics | Monolayer | /              | Cartilage ECM                                        | /                                                    | /                                                    | /                                                               | Exosomes            | /                       | Molding               | Rabbit  | X | X | X | X | Jiang, Shuangpeng et al. "Enhancement of acellular cartilage matrix scaffold by Wharton's jelly mesenchymal stem cell-derived exosomes to promote osteochondral regeneration." <i>Bioactive materials</i> vol. 6,9 2711-2728. 13 Feb. 2021.                                                                                  |
| Biomat + biologics | Monolayer | /              | PLGA+ PCL                                            | /                                                    | /                                                    | /                                                               | Insulin             | /                       | 3D-printing           | Rabbit  | X | X | X | X | Continued sustained insulin-releasing PLGA nanoparticles modified 3D-Printed PCL composite scaffolds for osteochondral repair                                                                                                                                                                                                |
| Biomat + biologics | Trilayer  | Biomat         | PLLA + GelMA + HA + CS                               | PLLA + GelMA                                         | Apatite + GelMA + PLLA                               | /                                                               | Peptides            | /                       | Electrospinning       | Rabbit  | X | X | X | X | Gradient fibrous aerogel conjugated with chemokine peptide for regulating cell differentiation and facilitating osteochondral regeneration                                                                                                                                                                                   |
| Biomat + cells     | Bilayer   | Biomat         | PEG + PGA + PNIPAAm + peptide                        | /                                                    | PEG + PGA + PNIPAAm + peptide                        | BM-MSCs                                                         | /                   | /                       | Molding               | Rabbit  | X | X |   |   | Guo, Jason L et al. "Bilayered, peptide-biofunctionalized hydrogels for in vivo osteochondral tissue repair." <i>Acta biomaterialia</i> vol. 128 (2021): 120-129.                                                                                                                                                            |
| Biomat + cells     | Monolayer | /              | Cartilage ECM                                        | /                                                    | /                                                    | Articular chondrocytes / Adip-MSCs                              | /                   | Fibrin glue             | Other                 | Rabbit  | X | X | X | X | Yin, Heyong et al. "Functional tissue-engineered microtissue derived from cartilage extracellular matrix for articular cartilage regeneration." <i>Acta biomaterialia</i> vol. 77 (2018): 127-141.                                                                                                                           |
| Biomat + cells     | Trilayer  | Biomat         | Cartilage ECM                                        | PLGA + b-TCP                                         | PLGA + b-TCP + Col                                   | BM-MSCs                                                         | /                   | /                       | Molding + 3D-printing | Goat    | X | X |   | X | Zhang, Ting et al. "Biomimetic design and fabrication of multilayered osteochondral scaffolds by low-temperature deposition manufacturing and thermal-induced phase-separation techniques." <i>Biofabrication</i> vol. 9,2 025021. 23 May. 2017.                                                                             |
| Biomat + cells     | Monolayer | /              | CS + PEG                                             | /                                                    | /                                                    | BM-MSCs                                                         | /                   | /                       | Molding               | Rabbit  | X | X | X | X | Feng, Xue et al. "Enhanced regeneration of osteochondral defects by using an aggrecanase-1 responsively degradable and N-cadherin mimetic peptide-conjugated hydrogel loaded with BMSCs." <i>Biomaterials science</i> vol. 8,8 (2020): 2212-2226                                                                             |
| Biomat + cells     | Monolayer | /              | Chitosan-Si + HPMC-Si                                | /                                                    | /                                                    | Adip-MSCs                                                       | /                   | /                       | Injection             | Dog     | X | X | X |   | Boyer, Cécile et al. "A Self-Setting Hydrogel of Silylated Chitosan and Cellulose for the Repair of Osteochondral Defects: From in vitro Characterization to Preclinical Evaluation in Dogs." <i>Frontiers in bioengineering and biotechnology</i> vol. 8 23. 29 Jan. 2020.                                                  |
| Biomat + cells     | Monolayer | /              | HA                                                   | /                                                    | /                                                    | UCB-MSCs                                                        | /                   | /                       | Malleable             | Minipig | X | X | X |   | Ha, Chul-Won et al. "Cartilage Repair Using Composites of Human Umbilical Cord Blood-Derived Mesenchymal Stem Cells and Hyaluronic Acid Hydrogel in a Minipig Model." <i>Stem cells translational medicine</i> vol. 4,9 (2015):                                                                                              |
| Biomat + cells     | Monolayer | /              | Cartilage ECM                                        | /                                                    | /                                                    | Adip-MSCs                                                       | /                   | /                       | Molding               | Rabbit  | X | X |   |   | Li, Xu et al. "Enrichment of CD146+ Adipose-Derived Stem Cells in Combination with Articular Cartilage Extracellular Matrix Scaffold Promotes Cartilage Regeneration." <i>Theranostics</i> vol. 9,17 5105-5121. 9 Jul. 2019                                                                                                  |
| Biomat + cells     | Monolayer | /              | Col I                                                | /                                                    | /                                                    | BM-MSCs                                                         | /                   | /                       | Other                 | Macaque | X | X | X |   | Araki, Susumu et al. "Improved quality of cartilage repair by bone marrow mesenchymal stem cells for treatment of an osteochondral defect in a cynomolgus macaque model." <i>Acta orthopaedica</i> vol. 86,1 (2015): 119-26.                                                                                                 |
| Biomat + cells     | Monolayer | /              | Alginate + OC grafts                                 | /                                                    | /                                                    | BM-MSCs expressing TGF-β                                        | /                   | Alginate gel            | Cut + malleable       | Goat    | X | X |   |   | Sun, Jun et al. "Restore a 9 mm diameter osteochondral defect with gene enhanced tissue engineering followed mosaicplasty in a goat model." <i>Acta orthopaedica et traumatologica turca</i> vol. 50,4 (2016): 464-9.                                                                                                        |
| Biomat + cells     | Bilayer   | Cells          | Fibrin                                               | /                                                    | Fibrin                                               | BM-MSCs                                                         | /                   | /                       | Molding               | Rabbit  | X |   | X | X | Wu, Yingnan et al. "Repair of Osteochondral Defects With Preadifferentiated Mesenchymal Stem Cells of Distinct Phenotypic Character Derived From a Nanotopographic Platform." <i>The American journal of sports medicine</i> vol. 48,7 (2020): 1735-1747.                                                                    |
| Biomat + cells     | Monolayer | /              | Cartilage particles + Fibrin                         | /                                                    | /                                                    | Amniotic MSCs                                                   | /                   | /                       | Other                 | Rabbit  | X | X | X |   | You, Qi et al. "Human Amniotic Mesenchymal Stem Cell Sheets Encapsulating Cartilage Particles Facilitate Repair of Rabbit Osteochondral Defects." <i>The American journal of sports medicine</i> vol. 48,3 (2020): 599-611                                                                                                   |
| Biomat + cells     | Monolayer | /              | Cartilage particles + Col                            | /                                                    | /                                                    | Articular chondrocytes                                          | /                   | Periosteal flap         | Malleable             | Rabbit  | X | X | X |   | Matsushita, Ryoosuke et al. "Repair of an Osteochondral Defect With Minced Cartilage Embedded in Atelocollagen Gel: A Rabbit Model." <i>The American journal of sports medicine</i> vol. 47,9 (2019): 2216-2224.                                                                                                             |
| Biomat + cells     | Monolayer | /              | CS + PEG                                             | /                                                    | /                                                    | BM-MSCs                                                         | /                   | Defect drying with CO2  | Injection             | Rabbit  | X | X | X |   | Pascual-Garrido, Cecilia et al. "Photopolymerizable Injectable Cartilage Mimetic Hydrogel for the Treatment of Focal Chondral Lesions: A Proof of Concept Study in a Rabbit Animal Model." <i>The American journal of sports medicine</i> vol. 47,1 (2019): 212-221.                                                         |
| Biomat + cells     | Monolayer | /              | HA                                                   | /                                                    | /                                                    | UCB-MSCs (differentiated into chondrocytes or undifferentiated) | /                   | /                       | Malleable             | Rat     | X | X | X |   | Park, Yong-Beom et al. "Comparison of Undifferentiated Versus Chondrogenic Preadifferentiated Mesenchymal Stem Cells Derived From Human Umbilical Cord Blood for Cartilage Repair in a Rat Model." <i>The American journal of sports medicine</i> vol. 47,2 (2019): 451-461.                                                 |
| Biomat + cells     | Monolayer | /              | Fibrin                                               | /                                                    | /                                                    | Articular chondrocytes (dediff or dediff et redifferentiated)   | /                   | Fibrin glue + press-fit | Malleable             | Rabbit  | X |   | X |   | Bianchi, Vanessa J et al. "Redifferentiated Chondrocytes in Fibrin Gel for the Repair of Articular Cartilage Lesions." <i>The American journal of sports medicine</i> vol. 47,10 (2019): 2348-2359.                                                                                                                          |
| Biomat + cells     | Monolayer | /              | Col II                                               | /                                                    | /                                                    | Articular chondrocytes                                          | /                   | /                       | Undefined             | Rabbit  | X | X |   |   | Wong, Chin-Chean et al. "Facilitating In Vivo Articular Cartilage Repair by Tissue-Engineered Cartilage Grafts Produced From Auricular Chondrocytes." <i>The American journal of sports medicine</i> vol. 46,3 (2018): 713-727.                                                                                              |
| Biomat + cells     | Monolayer | /              | Fibrin                                               | /                                                    | /                                                    | BM-MSCs                                                         | /                   | /                       | Malleable             | Rabbit  | X | X |   |   | Lee, Byung Hoon et al. "Therapeutic Efficacy of Spherical Aggregated Human Bone Marrow-Derived Mesenchymal Stem Cells Cultured for Osteochondral Defects of Rabbit Knee Joints." <i>The American journal of sports medicine</i> vol. 46,9 (2018): 2242-2252.                                                                 |
| Biomat + cells     | Bilayer   | Biomat + cells | /                                                    | /                                                    | b-TCP or HAP                                         | Syn-MSCs                                                        | /                   | Press-fit               | Commercial            | Rabbit  | X |   |   | X | Shimomura, Kazunori et al. "Comparison of 2 Different Formulations of Artificial Bone for a Hybrid Implant With a Tissue-Engineered Construct Derived From Synovial Mesenchymal Stem Cells: A Study Using a Rabbit Osteochondral Defect Model." <i>The American journal of sports medicine</i> vol. 45,3 (2017): 666-675.    |
| Biomat + cells     | Monolayer | /              | PCL + PLA                                            | /                                                    | /                                                    | BM-MSCs                                                         | /                   | Press-fit               | Other                 | Rabbit  | X | X | X |   | Barron, Valerie et al. "Evaluation of the Early In Vivo Response of a Functionally Graded Macroporous Scaffold in an Osteochondral Defect in a Rabbit Model." <i>Annals of biomedical engineering</i> vol. 44,5 (2016): 1832-44.                                                                                             |
| Biomat + cells     | Monolayer | /              | PEOT + PBT                                           | /                                                    | /                                                    | Other MSCs                                                      | /                   | Press-fit               | 3D-printing           | Rabbit  | X |   | X |   | Barron, V et al. "Evaluation of Cartilage Repair by Mesenchymal Stem Cells Seeded on a PEOT/PBT Scaffold in an Osteochondral Defect." <i>Annals of biomedical engineering</i> vol. 43,9 (2015): 2069-82.                                                                                                                     |
| Biomat + cells     | Monolayer | /              | Cartilage ECM                                        | /                                                    | /                                                    | UCB-MSCs (differentiated into chondrocytes or undifferentiated) | /                   | /                       | Molding               | Rabbit  | X | X |   |   | Liu, Shuyun et al. "Repair of Osteochondral Defects Using Human Umbilical Cord Wharton's Jelly-Derived Mesenchymal Stem Cells in a Rabbit Model." <i>BioMed research international</i> vol. 2017 (2017): 8760383                                                                                                             |
| Biomat + cells     | Monolayer | /              | Chitosan + PVA                                       | /                                                    | /                                                    | BM-MSCs                                                         | /                   | Bio-protein glue        | Cut                   | Rabbit  | X | X | X |   | Peng, Lianguan et al. "Characterization of a novel polyvinyl alcohol/chitosan porous hydrogel combined with bone marrow mesenchymal stem cells and its application in articular cartilage repair." <i>BMC musculoskeletal disorders</i> vol. 20,1 257. 29 May. 2019.                                                         |
| Biomat + cells     | Bilayer   | Biomat + cells | Col II + b-TCP                                       | /                                                    | Col I + b-TCP                                        | BM-MSCs                                                         | /                   | Press-fit               | Molding               | Dog     | X | X | X |   | Lv, Y M, and Q S Yu. "Repair of articular osteochondral defects of the knee joint using a composite lamellar scaffold." <i>Bone &amp; joint research</i> vol. 4,4 (2015): 56-64.                                                                                                                                             |
| Biomat + cells     | Trilayer  | Biomat         | Silicon-zirconium + hybrid organic-inorganic polymer | Silicon-zirconium + hybrid organic-inorganic polymer | Silicon-zirconium + hybrid organic-inorganic polymer | Articular chondrocytes                                          | /                   | Fibrin clot             | Other                 | Rabbit  | X | X |   | X | Maciulaitis, Justinas et al. "Osteochondral Repair and Electromechanical Evaluation of Custom 3D Scaffold Microstructured by Direct Laser Writing Lithography." <i>Cartilage</i> vol. 13,2_suppl (2021): 615S-625S.                                                                                                          |
| Biomat + cells     | Bilayer   | Biomat         | Col I                                                | /                                                    | b-TCP + PLA                                          | Mixed cells (from bone marrow aspirate)                         | /                   | /                       | Cut                   | Horse   | X | X | X | X | McCarrel, Taralyn M et al. "Two-Year Evaluation of Osteochondral Repair with a Novel Biphasic Graft Saturated in Bone Marrow in an Equine Model." <i>Cartilage</i> vol. 8,4 (2017): 406-416.                                                                                                                                 |
| Biomat + cells     | Monolayer | /              | Alginate                                             | /                                                    | /                                                    | Nasal chondrocytes                                              | /                   | /                       | Injection             | Rabbit  | X |   | X | X | Chen, Wenliang et al. "Autologous nasal chondrocytes delivered by injectable hydrogel for in vivo articular cartilage regeneration." <i>Cell and tissue banking</i> vol. 19,1 (2018): 35-46.                                                                                                                                 |
| Biomat + cells     | Monolayer | /              | Fibrin + silk fibroin                                | /                                                    | /                                                    | Articular chondrocytes                                          | /                   | /                       | Molding               | Rabbit  | X | X | X | X | Kazemnejad, Somaieh et al. "Comparative repair capacity of knee osteochondral defects using regenerated silk fiber scaffolds and fibrin glue with/without autologous chondrocytes during 36 weeks in rabbit model." <i>Cell and tissue research</i> vol. 364,3 (2016): 559-572.                                              |

|                |           |                    |                                    |                                    |                               |                                                   |   |                         |                      |         |   |   |   |   |                                                                                                                                                                                                                                                                                                                                                               |
|----------------|-----------|--------------------|------------------------------------|------------------------------------|-------------------------------|---------------------------------------------------|---|-------------------------|----------------------|---------|---|---|---|---|---------------------------------------------------------------------------------------------------------------------------------------------------------------------------------------------------------------------------------------------------------------------------------------------------------------------------------------------------------------|
| Biomat + cells | Monolayer | /                  | Col + TCP                          | /                                  | /                             | BM-MSCs                                           | / | /                       | Molding              | Rabbit  | X | X | X |   | Meng, F G et al. "Chondrogenesis of mesenchymal stem cells in a novel hyaluronate-collagen-tricalcium phosphate scaffolds for knee repair." <i>European cells &amp; materials</i> vol. 31 79-94. 5 Jan. 2016                                                                                                                                                  |
| Biomat + cells | Monolayer | /                  | Deminerlized bone ECM + gellan gum | /                                  | /                             | Articular chondrocytes                            | / | /                       | Punch                | Rabbit  | X |   |   | X | Kim, David et al. "Osteochondral and bone tissue engineering scaffold prepared from Gallus var domesticus derived deminerlized bone powder combined with gellan gum for medical application." <i>International journal of biological macromolecules</i> vol. 149 (2020): 381-394.                                                                             |
| Biomat + cells | Monolayer | /                  | Chitosan + HA                      | /                                  | /                             | Articular chondrocytes                            | / | Press-fit               | Undefined            | Rabbit  | X | X | X |   | Mohan, Neethu et al. "Chitosan-hyaluronic acid hydrogel for cartilage repair." <i>International journal of biological macromolecules</i> vol. 104,Pt B (2017): 1936-1945.                                                                                                                                                                                     |
| Biomat + cells | Bilayer   | Biomat + cells     | Cartilage ECM + silk fibroin       | /                                  | Bone ECM                      | Adip-MSCs                                         | / | Tisuacryl glue          | Molding              | Minipig | X | X | X |   | Pérez-Silos, Vanessa et al. "A Cellularized Biphasic Implant Based on a Bioactive Silk Fibroin Promotes Integration and Tissue Organization during Osteochondral Defect Repair in a Porcine Model." <i>International journal of molecular sciences</i> vol. 20,20 5145. 17 Oct. 2019.                                                                         |
| Biomat + cells | Monolayer | /                  | PLGA                               | /                                  | /                             | Other cells (Endothelial Progenitor Cells)        | / | Press-fit               | Molding              | Rabbit  | X | X | X | X | Wang, Hsueh-Chun et al. "Continuous Passive Motion Promotes and Maintains Chondrogenesis in Autologous Endothelial Progenitor Cell-Loaded Porous PLGA Scaffolds during Osteochondral Defect Repair in a Rabbit Model." <i>International journal of molecular sciences</i> vol. 20,2 259. 10 Jan. 2019.                                                        |
| Biomat + cells | Bilayer   | Cells              | PCL                                | /                                  | PCL                           | Articular chondrocytes (cartilage) BM-MSCs (bone) | / | Press-fit               | Molding              | Minipig | X | X | X | X | Bothe, Friederike et al. "Treatment of Focal Cartilage Defects in Minipigs with Zonal Chondrocyte/Mesenchymal Progenitor Cell Constructs." <i>International journal of molecular sciences</i> vol. 20,3 653. 2 Feb. 2019.                                                                                                                                     |
| Biomat + cells | Bilayer   | Biomat             | Chitosan + silk fibroin            | /                                  | Chitosan + HAP + silk fibroin | BM-MSCs                                           | / | /                       | Other                | Rabbit  |   | X | X | X | Ruan, Shi-Qiang et al. "Preparation of a biphasic composite scaffold and its application in tissue engineering for femoral osteochondral defects in rabbits." <i>International orthopaedics</i> vol. 41,9 (2017): 1899-1908.                                                                                                                                  |
| Biomat + cells | Bilayer   | Biomat             | Gelatin + PVA                      | /                                  | HAP + PA6                     | BM-MSCs                                           | / | /                       | Molding              | Rabbit  | X | X |   |   | Li, Xiang et al. "Osteogenesis and chondrogenesis of biomimetic integrated porous PVA/gel/V-n-HA/pa6 scaffolds and BMSCs construct in repair of articular osteochondral defect." <i>Journal of biomedical materials research. Part A</i> vol. 103,10 (2015): 3226-36.                                                                                         |
| Biomat + cells | Bilayer   | Biomat             | Col I + HA + PLA-PCL               | /                                  | b-TCP                         | BM-MSCs                                           | / | Press-fit               | Cut                  | Rabbit  | X | X | X |   | Liu, Shen et al. "Osteochondral regeneration using an oriented nanofiber yarn-collagen type I/hyaluronate hybrid/TCP biphasic scaffold." <i>Journal of biomedical materials research. Part A</i> vol. 103,2 (2015): 581-92.                                                                                                                                   |
| Biomat + cells | Bilayer   | Biomat             | Cartilage ECM                      | /                                  | Gelatin + PLGA                | Articular chondrocytes                            | / | Press-fit               | Molding              | Rabbit  | X |   | X |   | Nie, Xiaolei et al. "Engineering a multiphasic, integrated graft with a biologically developed cartilage-bone interface for osteochondral defect repair." <i>Journal of materials chemistry. B</i> vol. 7,42 (2019): 6515-6525.                                                                                                                               |
| Biomat + cells | Monolayer | /                  | Col I                              | /                                  | /                             | Articular chondrocytes                            | / | Col I gel               | Malleable            | Rabbit  | X | X | X | X | Yu, Cheng et al. "Repair of osteochondral defects in a rabbit model with artificial cartilage particulates derived from cultured collagen-chondrocyte microspheres." <i>Journal of materials chemistry. B</i> vol. 6,31 (2018): 5164-5173.                                                                                                                    |
| Biomat + cells | Monolayer | /                  | Placenta-derived ECM               | /                                  | /                             | Amniotic MSCs                                     | / | /                       | Molding              | Rabbit  | X | X | X |   | Rameshbabu, Arun Prabhu et al. "Investigating the potential of human placenta-derived extracellular matrix sponges coupled with amniotic membrane-derived stem cells for osteochondral tissue engineering." <i>Journal of materials chemistry. B</i> vol. 4,4 (2016): 613-625.                                                                                |
| Biomat + cells | Monolayer | /                  | Peptide-based hydrogels            | /                                  | /                             | Other MSCs                                        | / | /                       | Injection            | Rabbit  | X | X |   |   | Pescador, David et al. "Regeneration of hyaline cartilage promoted by xenogeneic mesenchymal stromal cells embedded within elastin-like recombinamer-based bioactive hydrogels." <i>Journal of materials science. Materials in medicine</i> vol. 28,8 (2017): 115.                                                                                            |
| Biomat + cells | Monolayer | /                  | Acellular dermal ECM               | /                                  | /                             | Adip-MSCs (infrapatellar fat pad)                 | / | Fibrin glue             | Punch                | Rabbit  | X | X | X |   | Ye, Ken et al. "Osteochondral repair using an acellular dermal matrix-pilot in vivo study in a rabbit osteochondral defect model." <i>Journal of orthopaedic research : official publication of the Orthopaedic Research Society</i> vol. 36,7 (2018): 1919-1928.                                                                                             |
| Biomat + cells | Bilayer   | Biomat             | PLGA                               | /                                  | PLGA                          | BM-MSCs                                           | / | Press-fit               | Molding              | Rabbit  | X | X | X | X | Duan, Pingguo et al. "Restoration of osteochondral defects by implanting bilayered poly(lactide-co-glycolide) porous scaffolds in rabbit joints for 12 and 24 weeks." <i>Journal of orthopaedic translation</i> vol. 19 68-80. 17 May. 2019.                                                                                                                  |
| Biomat + cells | Monolayer | /                  | Chitosan + PEO                     | /                                  | /                             | Syn-MSCs                                          | / | /                       | Injection            | Rabbit  | X | X | X |   | Jia, Zhaofeng et al. "Repair of osteochondral defects using injectable chitosan-based hydrogel encapsulated synovial fluid-derived mesenchymal stem cells in a rabbit model." <i>Materials science &amp; engineering. C. Materials for biological applications</i> vol. 99 (2019): 541-551.                                                                   |
| Biomat + cells | Monolayer | /                  | /                                  | /                                  | HAP + PCL                     | UCB-MSCs + articular chondrocytes                 | / | /                       | 3D-printing          | Rabbit  | X | X |   |   | Zheng, Pengfei et al. "A Rabbit Model of Osteochondral Regeneration Using Three-Dimensional Printed Polycaprolactone-Hydroxyapatite Scaffolds Coated with Umbilical Cord Blood Mesenchymal Stem Cells and Chondrocytes." <i>Medical science monitor : international medical journal of experimental and clinical research</i> vol. 25 7361-7369. 1 Oct. 2019. |
| Biomat + cells | Monolayer | /                  | Col I                              | /                                  | /                             | Articular chondrocytes                            | / | /                       | Cut                  | Rabbit  | X | X |   |   | Endo, J et al. "Utility of T2 mapping and dGEMRIC for evaluation of cartilage repair after allograft chondrocyte implantation in a rabbit model." <i>Osteoarthritis and cartilage</i> vol. 23,2 (2015): 280-8.                                                                                                                                                |
| Biomat + cells | Monolayer | /                  | HA                                 | /                                  | /                             | UCB-MSCs                                          | / | /                       | Malleable            | Rabbit  | X | X | X |   | Park, Yong-Beom et al. "Restoration of a large osteochondral defect of the knee using a composite of umbilical cord blood-derived mesenchymal stem cells and hyaluronic acid hydrogel: a case report with a 5-year follow-up." <i>BMC musculoskeletal disorders</i> vol. 18,1 59. 2 Feb. 2017.                                                                |
| Biomat + cells | Monolayer | /                  | Col I                              | /                                  | /                             | BM-MSCs                                           | / | Press-fit               | Undefined            | Rabbit  | X |   |   |   | Fekrazad, Reza et al. "Effects of Photobiomodulation and Mesenchymal Stem Cells on Articular Cartilage Defects in a Rabbit Model." <i>Photomedicine and laser surgery</i> vol. 34,11 (2016): 543-549.                                                                                                                                                         |
| Biomat + cells | Monolayer | /                  | HA                                 | /                                  | /                             | UCB-MSCs                                          | / | /                       | Undefined            | Rabbit  | X | X | X |   | Park, Yong-Beom et al. "Effect of Transplanting Various Concentrations of a Composite of Human Umbilical Cord Blood-Derived Mesenchymal Stem Cells and Hyaluronic Acid Hydrogel on Articular Cartilage Repair in a Rabbit Model." <i>PLoS one</i> vol. 11,11 e0165446. 8 Nov. 2016.                                                                           |
| Biomat + cells | Bilayer   | Biomat             | Col + GAG                          | /                                  | CaP + Col + GAG               | BM-MSCs + other MSCs (platelet derived MSCs)      | / | /                       | Undefined            | Sheep   | X | X | X | X | Hopper, Niina et al. "Peripheral Blood Mononuclear Cells Enhance Cartilage Repair in in vivo Osteochondral Defect Model." <i>PLoS one</i> vol. 10,8 e0133937. 7 Aug. 2015.                                                                                                                                                                                    |
| Biomat + cells | Monolayer | /                  | Peptide-based hydrogels            | /                                  | /                             | BM-MSCs                                           | / | /                       | Injection            | Rabbit  | X | X |   |   | Cipriani, Filippo et al. "An elastin-like recombinamer-based bioactive hydrogel embedded with mesenchymal stromal cells as an injectable scaffold for osteochondral repair." <i>Regenerative biomaterials</i> vol. 6,6 (2019): 335-347.                                                                                                                       |
| Biomat + cells | Bilayer   | Biomat             | PLGA                               | /                                  | PLGA                          | BM-MSCs                                           | / | Press-fit               | Molding              | Rabbit  | X | X | X |   | Pan, Zhen et al. "Effect of porosities of bilayered porous scaffolds on spontaneous osteochondral repair in cartilage tissue engineering." <i>Regenerative biomaterials</i> vol. 2,1 (2015): 9-19.                                                                                                                                                            |
| Biomat + cells | Monolayer | /                  | OPF                                | /                                  | /                             | Adip-MSCs                                         | / | Press-fit               | Punch                | Minipig | X |   | X | X | De Girolamo, Laura et al. "Repair of osteochondral defects in the minipig model by OPF hydrogel loaded with adipose-derived mesenchymal stem cells." <i>Regenerative medicine</i> vol. 10,2 (2015): 135-51.                                                                                                                                                   |
| Biomat + cells | Bilayer   | Cells              | Col + Porous tantalum              | /                                  | Col + Porous tantalum         | Articular chondrocytes + BM-MSCs                  | / | Fibrin glue             | Undefined            | Goat    | X | X | X |   | Wei, Xiaowei et al. "Mesenchymal stem cell-loaded porous tantalum integrated with biomimetic 3D collagen-based scaffold to repair large osteochondral defects in goats." <i>Stem cell research &amp; therapy</i> vol. 10,1 72. 5 Mar. 2019.                                                                                                                   |
| Biomat + cells | Monolayer | /                  | HA-MA                              | /                                  | /                             | BM-MSCs                                           | / | Press-fit               | Molding              | Rat     | X | X | X |   | Lin, Sien et al. "Synergistic effects on mesenchymal stem cell-based cartilage regeneration by chondrogenic preconditioning and mechanical stimulation." <i>Stem cell research &amp; therapy</i> vol. 8,1 221. 3 Oct. 2017.                                                                                                                                   |
| Biomat + cells | Monolayer | /                  | Agarose                            | /                                  | /                             | BM-MSCs or Syn-MSCs                               | / | /                       | Undefined            | Rat     | X | X | X |   | Zayed, Mohammed et al. "Xenogenic Implantation of Equine Synovial Fluid-Derived Mesenchymal Stem Cells Leads to Articular Cartilage Regeneration." <i>Stem cells international</i> vol. 2018 1073705. 6 Jun. 2018.                                                                                                                                            |
| Biomat + cells | Bilayer   | Structure + Biomat | Col I + Col III                    | /                                  | Col I + Col III               | Syn-MSCs or articular chondrocytes                | / | Press-fit + Fibrin glue | Commercial           | Rabbit  | X |   | X | X | Schmal, Hagen et al. "Comparison of Regenerative Tissue Quality following Matrix-Associated Cell Implantation Using Amplified Chondrocytes Compared to Synovium-Derived Stem Cells in a Rabbit Model for Cartilage Lesions." <i>Stem cells international</i> vol. 2018 4142031. 19 Apr. 2018.                                                                 |
| Biomat + cells | Monolayer | /                  | Fibrin                             | /                                  | /                             | Other MSCs (embryonic stem cells)                 | / | /                       | Cut                  | Rat     | X | X |   |   | Wang, Tao et al. "Enhanced chondrogenesis from human embryonic stem cells." <i>Stem cell research</i> vol. 39 (2019): 101497.                                                                                                                                                                                                                                 |
| Biomat + cells | Monolayer | /                  | Alginate                           | /                                  | /                             | BM-MSCs                                           | / | Press-fit               | Molding              | Rabbit  | X |   | X | X | Critchley, Susan et al. "Regeneration of Osteochondral Defects Using Developmentally Inspired Cartilaginous Templates." <i>Tissue engineering. Part A</i> vol. 25,3-4 (2019): 159-171                                                                                                                                                                         |
| Biomat + cells | Trilayer  | Biomat + cells     | Gelatin + chitosan                 | Gelatin + chitosan                 | b-TCP                         | BM-MSCs + chondrocytes                            | / | Press-fit               | Molding + Bioreactor | Goat    | X | X | X |   | Zhai, Chenjun et al. "Repair of Articular Osteochondral Defects Using an Integrated and Biomimetic Trilayered Scaffold." <i>Tissue engineering. Part A</i> vol. 24,21-22 (2018): 1680-1692.                                                                                                                                                                   |
| Biomat + cells | Monolayer | /                  | Gelatin                            | /                                  | /                             | Articular chondrocytes                            | / | /                       | Cut                  | Rabbit  | X | X | X | X | Wang, Chen-Chie et al. "Expandable Scaffold Improves Integration of Tissue-Engineered Cartilage: An In Vivo Study in a Rabbit Model." <i>Tissue engineering. Part A</i> vol. 22,11-12 (2016): 873-84.                                                                                                                                                         |
| Biomat + cells | Bilayer   | Biomat + cells     | Col I                              | /                                  | HAP                           | Articular chondrocytes                            | / | /                       | Molding              | Pork    | X | X | X | X | Sosio, Corrado et al. "Osteochondral repair by a novel interconnecting collagen-hydroxyapatite substitute: a large-animal study." <i>Tissue engineering. Part A</i> vol. 21,3-4 (2015): 704-15                                                                                                                                                                |
| Biomat + cells | Monolayer | /                  | Fibrin                             | /                                  | /                             | Other MSCs (menstrual MSCs)                       | / | /                       | Malleable            | Rabbit  | X | X | X |   | Khanmohammadi, Manijeh et al. "Repair of Osteochondral Defects in Rabbit Knee Using Menstrual Blood Stem Cells Encapsulated in Fibrin Glue: A Good Stem Cell Candidate for the Treatment of Osteochondral Defects." <i>Tissue engineering and regenerative medicine</i> vol. 16,3 311-324. 27 Apr. 2019.                                                      |
| Biomat + cells | Monolayer | /                  | Gelatin + alginate                 | /                                  | /                             | Articular chondrocytes                            | / | /                       | Other                | Rabbit  | X |   | X | X | Nie, Xiaolei et al. "Full-Scale Osteochondral Regeneration by Sole Graft of Tissue-Engineered Hyaline Cartilage without Co-Engraftment of Subchondral Bone Substitute." <i>Advanced healthcare materials</i> vol. 9,2 (2020): e1901304.                                                                                                                       |
| Biomat + cells | Bilayer   | Biomat + cells     | Alginate + CS-AEMA + GelMA         | Alginate + CS-AEMA + GelMA + HA-MA | /                             | BM-MSCs + articular chondrocytes                  | / | Press-fit               | 3D-printing          | Rat     | X | X | X |   | Idaszek, Joanna et al. "3D bioprinting of hydrogel constructs with cell and material gradients for the regeneration of full-thickness chondral defect using a microfluidic printing head." <i>Biofabrication</i> vol. 11,4 044101. 1 Jul. 2019.                                                                                                               |

|                            |           |                            |                            |                         |                           |                                                                     |                           |             |                               |            |   |   |   |   |   |                                                                                                                                                                                                                                                                                                                                                                            |
|----------------------------|-----------|----------------------------|----------------------------|-------------------------|---------------------------|---------------------------------------------------------------------|---------------------------|-------------|-------------------------------|------------|---|---|---|---|---|----------------------------------------------------------------------------------------------------------------------------------------------------------------------------------------------------------------------------------------------------------------------------------------------------------------------------------------------------------------------------|
| Biomat + cells             | Bilayer   | Biomat + cells             | HA + poly-glycidol + PCL   | /                       | PCL                       | BM-MSCs + articular cartilage progenitor cells (ACPC)               | /                         | Press-fit   | 3D-printing                   | Poney      | X | X | X | X | X | Mancini, I A D et al. "A composite hydrogel-3D printed thermoplast osteochondral anchor as example for a zonal approach to cartilage repair: in vivo performance in a long-term equine model." <i>Biofabrication</i> vol. 12,3 035028. 1 Jul. 2020.                                                                                                                        |
| Biomat + cells             | Bilayer   | Biomat + cells             | Agarose + alginate         | /                       | Alginate + BG             | BM-MSCs (bone) BM-MSCs + articular chondrocytes (cartilage)         | /                         | /           | Injection                     | Rat        | X | X | X | X |   | Zhu, Yanlun et al. "An injectable continuous stratified structurally and functionally biomimetic construct for enhancing osteochondral regeneration." <i>Biomaterials</i> vol. 192 (2019): 149-158.                                                                                                                                                                        |
| Biomat + cells             | Monolayer | /                          | PEG vinyl sulfone          | /                       | /                         | Chondrocytes                                                        | /                         | /           | Injection                     | Mouse      | X |   |   |   |   | Wang, Jianqi et al. "Fabrication of injectable high strength hydrogel based on 4-arm star PEG for cartilage tissue engineering." <i>Biomaterials</i> vol. 120 (2017): 11-21                                                                                                                                                                                                |
| Biomat + cells             | Monolayer | /                          | PLLA + Gelatin             | /                       | /                         | BM-MSCs (differentiated)                                            | /                         | /           | Electrospinning               | Rabbit     | X |   |   | X |   | Jin, Le et al. "Osteochondral tissue regenerated via a strategy by stacking pre-differentiated BMSC sheet on fibrous mesh in a gradient." <i>Biomedical materials</i> (Bristol, England) vol. 14,6 065017. 8 Nov. 2019.                                                                                                                                                    |
| Biomat + cells             | Monolayer | /                          | Col I                      | /                       | /                         | Mixed cells (from bone marrow)                                      | /                         | /           | Commercial                    | Rabbit     | X | X |   |   |   | Veronesi, Francesca et al. "Pulsed electromagnetic fields combined with a collagenous scaffold and bone marrow concentrate enhance osteochondral regeneration: an in vivo study." <i>BMC musculoskeletal disorders</i> vol. 16 233. 2 Sep. 2015.                                                                                                                           |
| Biomat + cells             | Monolayer | /                          | HA                         | /                       | /                         | UCB-MSCs                                                            | /                         | /           | Injection                     | Minipig    | X | X | X |   |   | Wu, Kun-Chi et al. "Transplanting human umbilical cord mesenchymal stem cells and hyaluronate hydrogel repairs cartilage of osteoarthritis in the minipig model." <i>Ci ji yi xue za zhi = Tzu-chi medical journal</i> vol. 31,1 (2019): 11-19.                                                                                                                            |
| Biomat + cells             | Monolayer | /                          | PLGA                       | /                       | /                         | BM-MSCs or Adip-MSCs or chondrocyte progenitor cells                | /                         | Press-fit   | Molding                       | Sheep      | X | X | X |   |   | Caminal, M et al. "Cartilage resurfacing potential of PLGA scaffolds loaded with autologous cells from cartilage, fat, and bone marrow in an ovine model of osteochondral focal defect." <i>Cytotechnology</i> vol. 68,4 (2016): 907-19                                                                                                                                    |
| Biomat + cells             | Monolayer | /                          | Fibrin                     | /                       | /                         | Embryonic stem-like cells (ESL)                                     | /                         | /           | Malleable                     | Sheep      | X | X | X |   | X | Manunta, Andrea Fabio et al. "The use of embryonic cells in the treatment of osteochondral defects of the knee: an ovine in vivo study." <i>Joints</i> vol. 4,2 70-9. 18 Aug. 2016.                                                                                                                                                                                        |
| Biomat + cells             | Monolayer | /                          | Dextran                    | /                       | /                         | Adip-MSCs or chondrocytes                                           | /                         | /           | Injection                     | Rabbit     | X | X | X |   |   | Fan, Lin et al. "An Injectable Bioorthogonal Dextran Hydrogel for Enhanced Chondrogenesis of Primary Stem Cells." <i>Tissue engineering. Part C, Methods</i> vol. 24,9 (2018): 504-513.                                                                                                                                                                                    |
| Biomat + cells             | Monolayer | /                          | Col I                      | /                       | /                         | Nasal chondrocytes                                                  | /                         | /           | Injection                     | Rat        | X | X | X |   |   | Lim, Mi Hyun et al. "Evaluation of Collagen Gel-Associated Human Nasal Septum-Derived Chondrocytes As a Clinically Applicable Injectable Therapeutic Agent for Cartilage Repair." <i>Tissue engineering and regenerative medicine</i> vol. 17,3 (2020): 387-399.                                                                                                           |
| Biomat + cells             | Monolayer | Biomat + cells             | Cartilage ECM + Col        | /                       | /                         | Articular chondrocytes                                              | /                         | /           | Other                         | Pork       | X |   | X |   |   | Meppelink, Amanda M et al. "Hyaline Articular Matrix Formed by Dynamic Self-Regenerating Cartilage and Hydrogels." <i>Tissue engineering. Part A</i> vol. 22,13-14 (2016): 962-70.                                                                                                                                                                                         |
| Biomat + cells             | Bilayer   | Biomat + cells             | Agarose or alginate        | /                       | Alginate + PCL or agarose | BM-MSCs (bone) Chondrocytes + Adip-MSCs (infrapatellar) (cartilage) | /                         | /           | 3D-printing + Molding         | Goat       | X |   | X |   |   | Critchley, Susan et al. "3D printing of fibre-reinforced cartilaginous templates for the regeneration of osteochondral defects." <i>Acta biomaterialia</i> vol. 113 (2020): 130-143.                                                                                                                                                                                       |
| Biomat + cells             | Monolayer | /                          | Col I                      | /                       | /                         | Nasal chondrocytes                                                  | /                         | /           | Injection                     | Rat        | X |   | X |   |   | Lim, Mi Hyun et al. "Evaluation of Collagen Gel-Associated Human Nasal Septum-Derived Chondrocytes As a Clinically Applicable Injectable Therapeutic Agent for Cartilage Repair." <i>Tissue engineering and regenerative medicine</i> vol. 17,3 (2020): 387-399.                                                                                                           |
| Biomat + cells             | Monolayer | /                          | Col I + Col II             | /                       | /                         | BM-MSCs                                                             | /                         | Press-fit   | Undefined                     | Rabbit     | X | X |   |   |   | Kilmer, Claire E et al. "Collagen Type I and II Blend Hydrogel with Autologous Mesenchymal Stem Cells as a Scaffold for Articular Cartilage Defect Repair." <i>ACS biomaterials science &amp; engineering</i> vol. 6,6 (2020): 3464-3476.                                                                                                                                  |
| Biomat + cells             | Monolayer | /                          | Cartilage ECM              | /                       | /                         | Adip-MSCs                                                           | /                         | Fibrin glue | Molding                       | Rabbit     | X | X |   |   |   | Widhiyanto, Lukas et al. "Macroscopic and histologic evaluation of cartilage regeneration treated using xenogenic biodegradable porous sponge cartilage scaffold composite supplemented with allogenic adipose derived mesenchymal stem cells (ASCs) and secretome: An in vivo experimental study." <i>Journal of biomaterials applications</i> vol. 35,3 (2020): 422-429. |
| Biomat + cells             | Monolayer | /                          | Cartilage ECM + gelatin    | /                       | /                         | Adip-MSCs                                                           | /                         | /           | Punch                         | Rabbit     | X |   |   | X |   | Tsai, Ching-Cheng et al. "Enzyme-Cross-linked Gelatin Hydrogel Enriched with an Articular Cartilage Extracellular Matrix and Human Adipose-Derived Stem Cells for Hyaline Cartilage Regeneration of Rabbits." <i>ACS biomaterials science &amp; engineering</i> vol. 6,9 (2020): 5110-5119.                                                                                |
| Biomat + cells             | Trilayer  | Biomat                     | Chitosan + gelatin         | Chitosan + gelatin      | /                         | BM-MSCs                                                             | /                         | Press-fit   | Molding                       | Rabbit     | X | X | X |   |   | Rajagopal, Karthikeyan et al. "In vivo cartilage regeneration in a multi-layered articular cartilage architecture mimicking scaffold." <i>Bone &amp; joint research</i> vol. 9,9 601-612. 23 Sep. 2020                                                                                                                                                                     |
| Biomat + cells             | Monolayer | /                          | PLGA + TCP                 | /                       | /                         | Adip-MSCs (infrapatellar fat pad)                                   | /                         | /           | Undefined                     | Rabbit     | X | X | X |   |   | Lu, Zhihua et al. "Unfavorable Contribution of a Tissue-Engineering Cartilage Graft to Osteochondral Defect Repair in Young Rabbits." <i>Frontiers in cell and developmental biology</i> vol. 8 595518. 29 Oct. 2020.                                                                                                                                                      |
| Biomat + cells             | Trilayer  | Biomat                     | Silk fibroin               | Silk fibroin + HAP      | Silk fibroin + HAP        | Adip-MSCs                                                           | /                         | /           | Molding                       | Rabbit     | X | X | X |   | X | Zhao, Yanhong et al. "Role of the Calcified Cartilage Layer of an Integrated Trilayered Silk Fibroin Scaffold Used to Regenerate Osteochondral Defects in Rabbit Knees." <i>ACS biomaterials science &amp; engineering</i> vol. 6,2 (2020): 1208-1216                                                                                                                      |
| Biomat + cells             | Monolayer | /                          | PCL                        | /                       | /                         | Other MSCs (foetal MSCs)                                            | /                         | Fibrin glue | Other                         | Rabbit     | X | X | X |   |   | Lin, Y. M et al. "Human early mesenchymal stromal cells delivered on porous lightweight biodegradable polycaprolactone-based microcarriers result in improved cartilage formation." <i>Materialia</i> , (2020) 13, 100851.                                                                                                                                                 |
| Biomat + cells             | Bilayer   | Biomat                     | PCL + PVA                  | /                       | BG                        | Chondrocytes                                                        | /                         | Fibrin glue | Undefined                     | Rabbit     | X | X |   |   |   | Rajagopal, Karthikeyan et al. "Long-Term Evaluation of Allogenic Chondrocyte-Loaded PVA-PCL IPN Scaffolds for Articular Cartilage Repair in Rabbits." <i>Indian journal of orthopaedics</i> vol. 55,4 853-860. 3 Jan. 2021.                                                                                                                                                |
| Biomat + cells             | Monolayer | /                          | Cartilage ECM + PCL + PGMA | /                       | /                         | Adip-MSCs                                                           | /                         | /           | Malleable                     | Rat        | X | X | X | X |   | Kim, Hye Sung et al. "Protein-reactive nanofibrils decorated with cartilage-derived decellularized extracellular matrix for osteochondral defects." <i>Biomaterials</i> vol. 269 (2021): 120214.                                                                                                                                                                           |
| Biomat + cells             | Monolayer | /                          | Silk fibroin               | /                       | /                         | Articular chondrocytes                                              | /                         | /           | Injection                     | Rabbit     | X | X | X |   | X | Yuan, Tao et al. "Injectable Ultrasonication-Induced Silk Fibroin Hydrogel for Cartilage Repair and Regeneration." <i>Tissue engineering. Part A</i> vol. 27,17-18 (2021): 1213-1224.                                                                                                                                                                                      |
| Biomat + cells             | Bilayer   | Biomat + cells             | Col I + HA                 | Col I + HA ??           | BCP                       | Articular chondrocytes + BM-MSCs                                    | /                         | /           | Molding                       | Rabbit     | X | X | X | X |   | Wang, Hongzhe et al. "Cell-mediated injectable blend hydrogel-BCP ceramic scaffold for in situ condylar osteochondral repair." <i>Acta biomaterialia</i> vol. 123 (2021): 364-378.                                                                                                                                                                                         |
| Biomat + cells             | Bilayer   | Biomat + cells             | /                          | /                       | Bone ECM                  | Chondrocytes                                                        | /                         | /           | ?                             | ?          | X |   | X |   |   | Wongin, Sopita et al. "Evaluation of osteochondral-like tissues using human freeze-dried cancellous bone and chondrocyte sheets to treat osteochondral defects in rabbits." <i>Biomaterials science</i> vol. 9,13 (2021): 4701-4716                                                                                                                                        |
| Biomat + cells             | Trilayer  | Biomat + cells             | Col                        | Calcified cartilage ECM | Subchondral bone ECM      | BM-MSCs                                                             | /                         | /           | Other                         | Minipig    | X | X | X |   |   | Huang, Yang et al. "Scaffold With Natural Calcified Cartilage Zone for Osteochondral Defect Repair in Minipigs." <i>The American journal of sports medicine</i> vol. 49,7 (2021): 1883-1891.                                                                                                                                                                               |
| Biomat + cells             | Monolayer | /                          | Fibrin                     | /                       | /                         | Articular chondrocytes                                              | /                         | /           | Malleable                     | Rabbit     | X | X | X | X | X | Yang, Yu et al. "Porcine fibrin sealant combined with autologous chondrocytes successfully promotes full-thickness cartilage regeneration in a rabbit model." <i>Journal of tissue engineering and regenerative medicine</i> vol. 15,9 (2021): 776-787.                                                                                                                    |
| Biomat + cells             | Bilayer   | Biomat                     | PCL                        | /                       | PCL + TCP                 | Adip-MSCs                                                           | /                         | Press-fit   | 3D-printing + electrospinning | Minipig    | X | X | X | X |   | Nordberg, Rachel C et al. "The evaluation of a multiphasic 3D-bioplotting scaffold seeded with adipose derived stem cells to repair osteochondral defects in a porcine model." <i>Journal of biomedical materials research. Part B, Applied biomaterials</i> vol. 109,12 (2021): 2246-2258                                                                                 |
| Biomat + cells             | Bilayer   | Biomat                     | Col I + Col III            | Col I + Col III         | /                         | Nasal chondrocytes                                                  | /                         | Press-fit   | Commercial                    | Sheep      | X | X | X |   |   | Šćerović, Amra et al. "Nasal Chondrocyte-Based Engineered Grafts for the Repair of Articular Cartilage "Kissing" Lesions: A Pilot Large-Animal Study." <i>The American journal of sports medicine</i> vol. 49,8 (2021): 2187-2198.                                                                                                                                         |
| Biomat + cells             | Monolayer | /                          | Col I + HAP + PVA          | /                       | /                         | Chondrocytes                                                        | /                         | /           | Molding                       | Goat       | X |   | X |   |   | Xie, Jie et al. "Fabrication and characterization of microstructure-controllable COL-HA-PVA hydrogels for cartilage repair." <i>Journal of materials science. Materials in medicine</i> vol. 32,9 100. 18 Aug. 2021.                                                                                                                                                       |
| Biomat + cells             | Bilayer   | Biomat                     | Cellulose + chitosan       | Chitosan + HAP          | /                         | Other MSCs (buccal fat pad)                                         | /                         | /           | Molding                       | Rabbit     | X |   | X |   |   | Dehghani Nazhvani, Fatemeh et al. "Effects of in vitro low oxygen tension preconditioning of buccal fat pad stem cells on in Vivo articular cartilage tissue repair." <i>Life sciences</i> vol. 280 (2021): 119728.                                                                                                                                                        |
| Biomat + cells             | Monolayer | /                          | Chitosan + HA              | /                       | /                         | Adip-MSCs                                                           | Chondrocyte extravesicles | /           | ?                             | Rabbit     | X |   |   |   |   | Heirani-Tabasi, Asieh et al. "Cartilage tissue engineering by co-transplantation of chondrocyte extracellular vesicles and mesenchymal stem cells, entrapped in chitosan-hyaluronic acid hydrogel." <i>Biomedical materials</i> (Bristol, England) vol. 16,5 10.1088/1748-605X/ac0cbf. 13 Jul. 2021                                                                        |
| Biomat + cells + biologics | Bilayer   | Cells + biologics          | Silk fibroin + GelMA       | /                       | Silk fibroin-MA + GelMA   | Articular chondrocytes (cartilage) / BM-MSCs (bone)                 | PTH                       | /           | 3D-printing                   | Rabbit     | X | X | X | X |   | Deng, Changxu et al. "3D bio-printed biphasic scaffolds with dual modification of silk fibroin for the integrated repair of osteochondral defects." <i>Biomaterials science</i> vol. 9,14 (2021): 4891-4903.                                                                                                                                                               |
| Biomat + cells + biologics | Monolayer | /                          | HA + Col I                 | /                       | /                         | BM-MSCs                                                             | Icariin                   | /           | Molding                       | Rabbit     | X |   | X |   |   | Yang, Jirong et al. "Icariin conjugated hyaluronic acid/collagen hydrogel for osteochondral interface restoration." <i>Acta biomaterialia</i> vol. 74 (2018): 156-167.                                                                                                                                                                                                     |
| Biomat + cells + biologics | Bilayer   | Biologics                  | HA-MA + GelMA              | /                       | HA-MA + GelMA             | BM-MSCs                                                             | Kartogenin, melatonin     | /           | Injection                     | Rabbit     | X | X | X | X |   | Liu, Xuemin et al. "Molecular recognition-directed site-specific release of stem cell differentiation inducers for enhanced joint repair." <i>Biomaterials</i> vol. 232 (2020): 119644                                                                                                                                                                                     |
| Biomat + cells + biologics | Monolayer | /                          | GelMA                      | /                       | /                         | Other MSCs                                                          | Kartogenin, TGF-b1        | Press-fit   | Injection                     | Rat        | X | X | X |   |   | Xu, Jianbin et al. "Injectable stem cell-laden supramolecular hydrogels enhance in situ osteochondral regeneration via the sustained co-delivery of hydrophilic and hydrophobic chondrogenic molecules." <i>Biomaterials</i> vol. 210 (2019): 51-61.                                                                                                                       |
| Biomat + cells + biologics | Monolayer | /                          | PLGA                       | /                       | /                         | Syn-MSCs                                                            | BMP-7                     | /           | Electrospinning               | Rabbit     | X |   | X |   |   | Kim, Hee Jung et al. "Intra-articular delivery of synovium-resident mesenchymal stem cells via BMP-7-loaded fibrous PLGA scaffolds for cartilage repair." <i>Journal of controlled release : official journal of the Controlled Release Society</i> vol. 302 (2019): 169-180.                                                                                              |
| Biomat + cells + biologics | Bilayer   | Biomat + cells + biologics | Alginate + HA              | /                       | PCL                       | BM-MSCs                                                             | BMP-2                     | /           | Electrospinning + injection   | Rat, sheep | X | X |   | X |   | Keller, Laetitia et al. "Preclinical safety study of a combined therapeutic bone wound dressing for osteoarticular regeneration." <i>Nature communications</i> vol. 10,1 2156. 14 May. 2019.                                                                                                                                                                               |
| Biomat + cells + biologics | Bilayer   | Biomat + biologics         | PLGA                       | /                       | PLGA                      | BM-MSCs                                                             | BMP-2                     | /           | Electrospinning + Molding     | Rabbit     | X |   | X |   |   | Vayas, Raquel et al. "Evaluation of the effectiveness of a BMSC and BMP-2 polymeric trilayer system in cartilage repair." <i>Biomedical materials</i> (Bristol, England) vol. 12,4 045001. 4 Jul. 2017.                                                                                                                                                                    |

|                            |           |                            |                              |                     |                             |                                                                                                  |                                  |                             |                                                         |         |   |   |   |   |                                                                                                                                                                                                                                                                                                                                                  |                                                                                                                                                                                                                                                            |
|----------------------------|-----------|----------------------------|------------------------------|---------------------|-----------------------------|--------------------------------------------------------------------------------------------------|----------------------------------|-----------------------------|---------------------------------------------------------|---------|---|---|---|---|--------------------------------------------------------------------------------------------------------------------------------------------------------------------------------------------------------------------------------------------------------------------------------------------------------------------------------------------------|------------------------------------------------------------------------------------------------------------------------------------------------------------------------------------------------------------------------------------------------------------|
| Biomat + cells + biologics | Monolayer | /                          | Laminin                      | /                   | /                           | BM-MSCs                                                                                          | IGF-1, TGF-b1                    | /                           | Malleable                                               | Rabbit  | X | X |   |   | Gugjoo, Mudasar Bashir et al. "Mesenchymal stem cells with IGF-1 and TGF-β1 in laminin gel for osteochondral defects in rabbits." <i>Biomedicine &amp; pharmacotherapy = Biomedicine &amp; pharmacotherapie</i> vol. 93 (2017): 1165-1174.                                                                                                       |                                                                                                                                                                                                                                                            |
| Biomat + cells + biologics | Monolayer | /                          | PRF                          | /                   | /                           | BM-MSCs                                                                                          | PRF                              | Press-fit                   | Other                                                   | Dog     | X | X |   |   | Kazemi, D et al. "Canine articular cartilage regeneration using mesenchymal stem cells seeded on platelet rich fibrin: Macroscopic and histological assessments." <i>Bone &amp; joint research</i> vol. 6.2 (2017): 98-107.                                                                                                                      |                                                                                                                                                                                                                                                            |
| Biomat + cells + biologics | Bilayer   | Biomat + cells             | /                            | /                   | Porous tantalum             | Other cells (periosteal)                                                                         | TGF-b1                           | Press-fit                   | Commercial                                              | Sheep   | X | X |   |   | Mrosek, E H et al. "Porous tantalum biocomposites for osteochondral defect repair: A follow-up study in a sheep model." <i>Bone &amp; joint research</i> vol. 5.9 (2016): 403-11.                                                                                                                                                                |                                                                                                                                                                                                                                                            |
| Biomat + cells + biologics | Monolayer | /                          | Alginate                     | /                   | /                           | Adip-MSCs                                                                                        | PRP                              | Periosteal flap             | Malleable                                               | Rabbit  | X | X |   |   | Beigi, Mohammad-Hosseini et al. "Activated platelet-rich plasma improves cartilage regeneration using adipose stem cells encapsulated in a 3D alginate scaffold." <i>Journal of tissue engineering and regenerative medicine</i> vol. 12,6 (2018): 1327-1338.                                                                                    |                                                                                                                                                                                                                                                            |
| Biomat + cells + biologics | Monolayer | /                          | Col I                        | /                   | /                           | BM-MSCs                                                                                          | IGF-1, TGF-b1                    | /                           | Undefined                                               | Rabbit  | X | X |   |   | Gugjoo, Mudasar Bashir et al. "Allogeneic mesenchymal stem cells and growth factors in gel scaffold repair osteochondral defect in rabbit." <i>Regenerative medicine</i> vol. 15,2 (2020): 1261-1275.                                                                                                                                            |                                                                                                                                                                                                                                                            |
| Biomat + cells + biologics | Monolayer | /                          | Gelatin + b-TCP              | /                   | /                           | BM-MSCs                                                                                          | BMP-2, PRP                       | Synovial flap + fibrin glue | Cut                                                     | Horse   | X | X | X | X | Seo, Jong-Pil et al. "Effects of a synovial flap and gelatin/β-tricalcium phosphate sponges loaded with mesenchymal stem cells, bone morphogenetic protein-2, and platelet rich plasma on equine osteochondral defects." <i>Research in veterinary science</i> vol. 101 (2015): 140-3                                                            |                                                                                                                                                                                                                                                            |
| Biomat + cells + biologics | Bilayer   | Biomat                     | PLCL                         | /                   | b-TCP + PLA                 | BM-MSCs                                                                                          | IL-8                             | Press-fit                   | Molding                                                 | Dog     | X | X | X |   | Yoon, Dong Suk et al. "Synergistic Action of IL-8 and Bone Marrow Concentrate on Cartilage Regeneration Through Upregulation of Chondrogenic Transcription Factors." <i>Tissue engineering. Part A</i> vol. 22,3-4 (2016): 363-74.                                                                                                               |                                                                                                                                                                                                                                                            |
| Biomat + cells + biologics | Monolayer | /                          | PEO + PU                     | /                   |                             | BM-MSCs                                                                                          | SDF-1, Y27632 drug               | /                           | 3D-printing                                             | Rabbit  | X | X |   |   | Wen, Yi-Ting et al. "Biodegradable water-based polyurethane scaffolds with a sequential release function for cell-free cartilage tissue engineering." <i>Acta biomaterialia</i> vol. 88 (2019): 301-313.                                                                                                                                         |                                                                                                                                                                                                                                                            |
| Biomat + cells + biologics | Bilayer   | Biomat + biologics         | HA + PCL                     | /                   | Col I + PCL                 | Other MSCs (turbinate-derived)                                                                   | BMP-2, TGF-b                     | Press-fit                   | 3D-printing                                             | Rabbit  | X | X | X |   | Shim, Jin-Hyung et al. "Three-dimensional bioprinting of multilayered constructs containing human mesenchymal stromal cells for osteochondral tissue regeneration in the rabbit knee joint." <i>Biofabrication</i> vol. 8,1 014102. 4 Feb. 2016.                                                                                                 |                                                                                                                                                                                                                                                            |
| Biomat + cells + biologics | Bilayer   | Biomat                     | Col I + PLA-PCL              | /                   | TCP                         | BM-MSCs (transfected for COMP expression)                                                        | COMP                             | /                           | Electrospinning + punch + commercial                    | Rabbit  | X | X | X | X | Wang, Chongyang et al. "Cartilage oligomeric matrix protein improves in vivo cartilage regeneration and compression modulus by enhancing matrix assembly and synthesis." <i>Colloids and surfaces. B, Biointerfaces</i> vol. 159 (2017): 518-526.                                                                                                |                                                                                                                                                                                                                                                            |
| Biomat + cells + biologics | Monolayer | /                          | Fibrin+ fibrinogen           | /                   | /                           | BM-MSCs                                                                                          | Plasmid                          | /                           | Molding                                                 | Rabbit  | X | X |   | X | Feng, Xue et al. "Age-Related Regeneration of Osteochondral and Tibial Defects by a Fibrin-Based Construct in vivo." <i>Frontiers in bioengineering and biotechnology</i> vol. 8 404. 5 May. 2020.                                                                                                                                               |                                                                                                                                                                                                                                                            |
| Biomat + cells + biologics | Monolayer | Biomat                     | Col I + cartilage ECM        | /                   | /                           | BM-MSCs                                                                                          | BMP-7                            | /                           | Cut                                                     | Dog     | X | X | X | X | Sun, Jiachen et al. "A biphasic, demineralized, and Decellularized allograft bone-hydrogel scaffold with a cell-based BMP-7 delivery system for osteochondral defect regeneration." <i>Journal of biomedical materials research. Part A</i> vol. 108,9 (2020): 1909-1921.                                                                        |                                                                                                                                                                                                                                                            |
| Biomat + cells + biologics | Bilayer   | Biomat + biologics         | Chitosan + PLGA +            | /                   | Chitosan + HAP + PLGA       | Adip-MSCs                                                                                        | BMP-2                            | /                           | Undefined                                               | Rabbit  | X | X | X |   | Zhang, Kunxi et al. "Regeneration of hyaline-like cartilage and subchondral bone simultaneously by poly(l-glutamic acid) based osteochondral scaffolds with induced autologous adipose derived stem cells." <i>Journal of materials chemistry. B</i> vol. 4,15 (2016): 2628-2645.                                                                |                                                                                                                                                                                                                                                            |
| Biomat + cells + biologics | Monolayer | /                          | HA                           | /                   | /                           | Adip-MSCs (infrapatellar fat pad)                                                                | Matrilin-3                       | /                           | Malleable                                               | Rat     | X | X |   |   | Muttigi, Manjunatha S et al. "Matrilin-3 codelivery with adipose-derived mesenchymal stem cells promotes articular cartilage regeneration in a rat osteochondral defect model." <i>Journal of tissue engineering and regenerative medicine</i> vol. 12,3 (2018): 667-675.                                                                        |                                                                                                                                                                                                                                                            |
| Biomat + cells + biologics | Monolayer | /                          | Alginate                     | /                   | /                           | Adip-MSCs                                                                                        | BMP-4                            | /                           | Injection                                               | Pork    | X | X | X | X | Chen, Linxin et al. "CaAlg hydrogel containing bone morphogenetic protein 4-enhanced adipose-derived stem cells combined with osteochondral mosaicsplasty facilitated the repair of large osteochondral defects." <i>Knee surgery, sports traumatology, arthroscopy : official journal of the ESSKA</i> vol. 27,11 (2019): 3668-3678.            |                                                                                                                                                                                                                                                            |
| Biomat + cells + biologics | Trilayer  | Biomat + biologics         | Cartilage ECM + silk fibroin | nHAP + silk fibroin | nHAP + silk fibroin         | UCB-MSCs                                                                                         | BMP-2, TGF-b3                    | /                           | Molding                                                 | Rabbit  | X | X | X | X | Dong, Yunsheng et al. "Regional and sustained dual-release of growth factors from biomimetic tri-layered scaffolds for the repair of large-scale osteochondral defects." <i>Applied Materials Today</i> , 19, (2020) 100548.                                                                                                                     |                                                                                                                                                                                                                                                            |
| Biomat + cells + biologics | Bilayer   | Biomat + cells + biologics | Alginate + HA                | /                   | Col                         | BM-MSCs                                                                                          | BMP-2                            | /                           | Punch + Malleable                                       | Sheep   | X | X |   | X | Favreau, Henri et al. "Osteochondral repair combining therapeutics implant with mesenchymal stem cells spheroids." <i>Nanomedicine : nanotechnology, biology, and medicine</i> vol. 29 (2020): 102253.                                                                                                                                           |                                                                                                                                                                                                                                                            |
| Biomat + cells + biologics | Monolayer | /                          | Placental MEC                | /                   | /                           | BM-MSCs                                                                                          | PRP                              | /                           | Cut                                                     | Rat     | X |   |   |   | Özdemir, Erdi et al. "Articular Cartilage Regeneration Utilizing Decellularized Human Placental Scaffold, Mesenchymal Stem Cells and Platelet Rich Plasma." <i>Tissue engineering and regenerative medicine</i> vol. 17,6 (2020): 901-908                                                                                                        |                                                                                                                                                                                                                                                            |
| Biomat + cells + biologics | Monolayer | /                          | AH-MA + PLGA + Poly-L-lysine | /                   | /                           | Adip-MSCs                                                                                        | Kartogenin                       | /                           | Undefined                                               | Rabbit  | X | X |   |   | Hong, Yuping et al. "Combination Therapy Using Kartogenin-Based Chondrogenesis and Complex Polymer Scaffold for Cartilage Defect Regeneration." <i>ACS biomaterials science &amp; engineering</i> vol. 6,11 (2020): 6276-6284.                                                                                                                   |                                                                                                                                                                                                                                                            |
| Biomat + cells + biologics | Monolayer | /                          | Gelatine-SH + PEGDA          | /                   | /                           | Adip-MSCs                                                                                        | IGF-1                            | /                           | Molding                                                 | Rabbit  | X | X |   |   | Cho, Hyeran et al. "Dual delivery of stem cells and insulin-like growth factor-1 in coacervate-embedded composite hydrogels for enhanced cartilage regeneration in osteochondral defects." <i>Journal of controlled release : official journal of the Controlled Release Society</i> vol. 327 (2020): 284-295.                                   |                                                                                                                                                                                                                                                            |
| Biomat + cells + biologics | Monolayer | /                          | Col + HA + fibrinogen        | /                   | /                           | Syn-MSCs                                                                                         | Transglutaminase-4               | /                           | Injection                                               | Rabbit  | X | X | X |   | Kim, Jong-Keun et al. "Enhancement of Cartilage Regeneration of Synovial Stem Cells/Hydrogel by Using Transglutaminase-4." <i>Tissue engineering. Part A</i> vol. 27,11-12 (2021): 761-770.                                                                                                                                                      |                                                                                                                                                                                                                                                            |
| Biomat + cells + biologics | Trilayer  | Biomat                     | GelMA + PCL + PEG            | GelMA + PCL + PEG   | GelMA + PCL + PEG           | BM-MSCs                                                                                          | BMP-2, BMP-7, TGF-b1             | /                           | Molding + 3D-printing                                   | Rabbit  | X | X | X | X | X                                                                                                                                                                                                                                                                                                                                                | Qiao, Zhiguang et al. "Bioinspired stratified electrospun fiber-reinforced hydrogel constructs with layer-specific induction capacity for functional osteochondral regeneration." <i>Biomaterials</i> vol. 266 (2021): 120385.                             |
| Biomat + cells + biologics | Monolayer | /                          | Col                          | /                   | /                           | BM-MSCs                                                                                          | HIF-1a                           | /                           | ?                                                       | Rabbit  | X | X | X | X | Cheng, Mo-Sha et al. "Overexpression of HIF-1alpha in Bone Marrow Mesenchymal Stem Cells Promote the Repair of Mandibular Condylar Osteochondral Defect in a Rabbit Model." <i>Journal of oral and maxillofacial surgery : official journal of the American Association of Oral and Maxillofacial Surgeons</i> vol. 79,2 (2021): 345.e1-345.e15. |                                                                                                                                                                                                                                                            |
| Biomat + cells + biologics | Trilayer  | Biomat                     | Col or PLGA                  | Col + HAP or PLA    | Col + HAP or titanium alloy | BM-MSCs                                                                                          | Bone marrow aspirate concentrate | Press-fit                   | Molding (scaffold 1) 3D-printing + Molding (scaffold 2) | Sheep   |   | X |   | X | Flaherty, Taylor et al. "Micro-Computed Tomography Analysis of Subchondral Bone Regeneration Using Osteochondral Scaffolds in an Ovine Condyle Model". <i>Appl. Sci.</i> 2021, 11, 891                                                                                                                                                           |                                                                                                                                                                                                                                                            |
| Biomat + cells + biologics | Monolayer | /                          | Alginate                     | /                   | /                           | BM-MSCs                                                                                          | Bone marrow aspirate concentrate | /                           | Malleable                                               | Rabbit  | X | X | X | X | X                                                                                                                                                                                                                                                                                                                                                | Xu, Liang et al. "Ultrapurified Alginate Gel Containing Bone Marrow Aspirate Concentrate Enhances Cartilage and Bone Regeneration on Osteochondral Defects in a Rabbit Model." <i>The American journal of sports medicine</i> vol. 49,8 (2021): 2199-2210. |
| Biomat + cells + biologics | Monolayer | /                          | Alginate                     | /                   | /                           | BM-MSCs                                                                                          | Ghrelin, TGF-b3                  | /                           | Undefined                                               | Rat     | X | X | X |   | Li, Kejia et al. "Nanosecond pulsed electric fields prime mesenchymal stem cells to peptide ghrelin and enhance chondrogenesis and osteochondral defect repair in vivo." <i>Science China. Life sciences</i> , 10.1007/s11427-021-1983-y. 23 Sep. 2021.                                                                                          |                                                                                                                                                                                                                                                            |
| Biomat + graft             | Monolayer | /                          | Alginate                     | /                   | /                           | Mixed cells                                                                                      | Mixed biologics                  | /                           | Undefined                                               | Rabbit  | X | X | X | X | Hishimura, Ryosuke et al. "Osteochondral Autograft Transplantation Technique Augmented by an Ultrapurified Alginate Gel Enhances Osteochondral Repair in a Rabbit Model." <i>The American journal of sports medicine</i> vol. 47,2 (2019): 468-478                                                                                               |                                                                                                                                                                                                                                                            |
| Biomat + graft             | Trilayer  | Biomat + cells             | PLGA                         | PLGA                | Titanium alloy              | Articular chondrocytes (titane implant) or articular chondrocytes (cartilage) and BM-MSCs (bone) | BMP-2; TGF-b3                    | Press-fit                   | 3D-printing + bioreactor                                | Goat    | X | X | X |   | X                                                                                                                                                                                                                                                                                                                                                | Zhai, Chenjun, et al. "Utilizing an integrated tri-layered scaffold with Titanium-Mesh-Cage base to repair cartilage defects of knee in goat model." <i>Materials &amp; Design</i> , 193, (2020) 108766                                                    |
| Cultured graft             | Bilayer   | Biomat                     | Col I                        | /                   | Col I + HAP                 | Nasal chondrocytes                                                                               | Mixed biologics (cultured graft) | Press-fit                   | Other                                                   | Sheep   | X | X | X |   | Vukasovic, Andreja et al. "Bioreactor-manufactured cartilage grafts repair acute and chronic osteochondral defects in large animal studies." <i>Cell proliferation</i> vol. 52,6 (2019): e12653.                                                                                                                                                 |                                                                                                                                                                                                                                                            |
| Cultured graft             | Trilayer  | Biomat                     | Agarose                      | Agarose + bone ECM  | Bone ECM                    | Articular chondrocytes                                                                           | Mixed biologics                  | Press-fit                   | Molding                                                 | Dog     | X | X | X |   | Stefani, Robert M et al. "Pulsed electromagnetic fields promote repair of focal articular cartilage defects with engineered osteochondral constructs." <i>Biotechnology and bioengineering</i> vol. 117,5 (2020): 1584-1596.                                                                                                                     |                                                                                                                                                                                                                                                            |
| Cultured graft             | Monolayer | /                          | PLA + PGA                    | /                   | /                           | BM-MSCs                                                                                          | /                                | Suture                      | Molding                                                 | Minipig | X | X | X |   | X                                                                                                                                                                                                                                                                                                                                                | He, Aijuan et al. "Repair of osteochondral defects with in vitro engineered cartilage based on autologous bone marrow stromal cells in a swine model." <i>Scientific reports</i> vol. 7 40489. 13 Jan. 2017.                                               |

#### Abbreviations

|               |                                               |
|---------------|-----------------------------------------------|
| Adip-MSCs     | Adipose-derived mesenchymal stromal cells     |
| Amniotic MSCs | Amniotic mesenchymal stromal cells            |
| b-TCP         | Beta-tricalcium phosphate                     |
| BG            | Bioactive glass                               |
| Biomat        | Biomaterial                                   |
| BM-MSCs       | Bone marrow-derived mesenchymal stromal cells |
| BMP-2         | Bone morphogenic protein-2                    |
| BMP-4         | Bone morphogenic protein-4                    |



|             |                                                        |
|-------------|--------------------------------------------------------|
| BMP-7       | Bone morphogenic protein-7                             |
| CaP         | Calcium Phosphate                                      |
| Col         | Collagen                                               |
| Col I       | Collagen type I                                        |
| Col II      | Collagen type II                                       |
| Col III     | Collagen type III                                      |
| Col X       | Collagen type X                                        |
| COMP        | Cartilage oligomeric protein                           |
| CS          | Chondroitin sulfate                                    |
| CS-AEMA     | Chondroitin sulfate-aminoethyl methacrylate            |
| ECM         | Extracellular matrix                                   |
| FGF-2       | Fibroblast growth factor-2                             |
| GAG         | Glycosaminoglycan                                      |
| GelMA       | Gelatin-methacrylate                                   |
| Glycidyl-MA | Glycidyl-methacrylate                                  |
| HA          | Hyaluronic acid                                        |
| HA-MA       | Hyaluronic acid-methacrylate                           |
| HAP         | Hydroxyapatite                                         |
| Histo       | Histology                                              |
| IGF-1       | Insulin growth factor-1                                |
| IHC         | Immunohistochemistry                                   |
| IL-4        | Interleukin-4                                          |
| IL-8        | Interleukin-8                                          |
| Macro. Obs. | Macroscopic observation                                |
| Micro-CT    | Micro-computed tomography                              |
| MIP-3a      | Macrophage inflammatory protein-3 alpha                |
| MSCs        | Mesenchymal stromal cells                              |
| OPF         | Oligo(polyethylene glycol) fumarate                    |
| PA6         | Polyamide 6                                            |
| PACG        | Poly(N-acryloyl 2-glycine)                             |
| PAMPS       | Poly-(2-acrylamido-2-methylpropanesulfonic acid)       |
| PBT         | Poly(butylene terephthalate)                           |
| PCL         | Poly(caprolactone)                                     |
| PDGF        | Platelet-derived growth factor                         |
| PDMAAm      | Poly-(N,N'-dimethyl acrylamide)                        |
| PEEK        | Polyetheretherketone                                   |
| PEG-MA      | Poly(ethylene glycol)-methacrylate                     |
| PEGDA       | Poly(ethylene glycol)-diacrylate                       |
| PEO         | Poly(ethylene oxide)                                   |
| PEOT        | Poly(ethyleneoxide)-terephthalate                      |
| PGA         | Poly(glycolic acid)                                    |
| PLA         | Poly(lactic acid)                                      |
| PLCL        | Poly (l-lactide-co-ε-caprolactone)                     |
| PLGA        | Poly(lactic-co-glycolic acid)                          |
| PNAGA       | Poly(N-acryloyl glycinamide)                           |
| PNIPAAm     | poly(N-isopropylacrylamide)                            |
| PRF         | Platelet-rich fibrin                                   |
| PRP         | Platelet-rich plasma                                   |
| PSPU-U      | Polyester polyurethane-urea                            |
| PTB         | Polybutylene-terephthalate                             |
| PTH         | Parathyroid hormone                                    |
| PU          | Polyurethane                                           |
| PVA         | Poly vinyl alcohol                                     |
| rAAV        | Recombinant adeno associated virus                     |
| SDF-1       | Stromal-derived factor-1                               |
| Syn-MSCs    | Synovial mesenchymal stromal cells                     |
| TCP         | Tricalcium phosphate                                   |
| TGF-b1      | Transforming growth factor beta1                       |
| TGF-b3      | Transforming growth factor beta3                       |
| UCB-MSCs    | Umbilical cord blood-derived mesenchymal stromal cells |
| Wnt5a       | Wingless type 5a                                       |
